# Supplementary material for: A computational investigation on singlet and triplet exciton couplings in acene molecular crystals
Source: Royal Society of Chemistry journal article supplement (doi:10.1039/c1cp21246j), 2011-01-01

## SUPPORTING INFORMATIONS

for

### **A computational investigation on singlet and triplet exciton couplings in acenes molecular crystals**

Claudio Quarti<sup>a</sup>, Daniele Fazzi<sup>b\*</sup> and Mirella Del Zoppo<sup>a</sup>

a. Dipartimento di Chimica, Materiali e Ing. Chimica CMIC “G. Natta”, Politecnico di Milano, p.za Leonardo da Vinci 32,  
20133, Milano and INSTM Udr Milano

b. Center for Nano Science and Technology @PoliMi, Istituto Italiano di Tecnologia, Via Giovanni Pascoli, 70/3, 20133  
Milano

Corresponding author: daniele.fazzi@iit.it

#### List of contents:

- **Exciton couplings of the most interacting dimers, by using the IEFPCM method (Table SI1)**
- **TD-DFT Singlet and triplet excitation energies of BPEA evaluated with different functionals (Table SI2).**
- **Atom numbering of anthracene, tetracene, DPA and BPEA (Fig. SI1).**
- **Unit cells of anthracene, tetracene, DPA and BPEA (Fig. SI2 – SI5).**
- **Molecular dimers found in the experimental crystal structures (Fig. SI6 – SI9).**
- **TDDFT exciton couplings evaluated with the PDA (Table SI3)**
- **Transition density matrix projections for singlet excited states evaluated at ZINDO/S level (Table SI4 – SI7).**
- **Properties of the singlet excited states of the molecular dimers evaluated at TD-B3LYP/6-31G<sup>\*\*</sup>: excitation energies, oscillator strength, molecular orbitals involved in the main transitions, TD-DFT eigenvector of the main transitions (Table SI7 - SI10).**
- **High density planes for anthracene, tetracene and BPEA (Fig. SI10 - SI12).**
- **Singlets excited states of the molecular dimers evaluated with TD-B3LYP/6-31G<sup>\*\*</sup> (Fig. SI13);**

- **Singlet excited states evaluated with TD-CAM-B3LYP/6-31G\*\* (Fig. SI14).**
- **Triplet excited states of the molecular dimers evaluated with TD-B3LYP/6-31G\*\* (Fig. SI15)**
- **Triplet excited states evaluated with TD-CAM-B3LYP/6-31G\*\* (Fig. SI16).**

**Table S11**

Comparison between exciton couplings  $V$  for the most interacting dimers of compounds **1-4**, calculated at TD-B3LYP and TD-CAM-B3LYP/6-31G\*\* level. Calculations have been carried out:

- in vacuo;
- in isotropic solvent ( $\epsilon = 3.5$ ) (IEFPCM calculations);
- anisotropic solvent ( $\epsilon_x = 4, \epsilon_y = 2.5$ ) (IEFPCM calculations);

| <i>Compound and dimer</i>   | $V_{\text{vacuum}} \text{ (cm}^{-1}\text{)}$ | IEFPCM (cm <sup>-1</sup> ) |                                        |
|-----------------------------|----------------------------------------------|----------------------------|----------------------------------------|
|                             |                                              | isotropic                  | anisotropic                            |
| Centro-symmetric dimers     |                                              |                            |                                        |
| <i>Anthracene</i> dimer B   | 256                                          | 250                        | 258                                    |
| <i>Tetracene</i> dimer B1   | 134                                          | 139                        | 133                                    |
| <i>BPEA</i> dimer A         | 221                                          | 111                        | 299 (x direction)<br>(298 z direction) |
| Non-centro-symmetric dimers |                                              |                            |                                        |
| <i>Anthracene</i> dimer A   | 25                                           | 5                          | 4                                      |
| <i>DPA</i> dimer D          | 96                                           | 83                         | 101                                    |
| <i>BPEA</i> dimer F         | 215                                          | 141                        | 272                                    |

**Table S12**

Excitation energies of the first singlet and triplet excited state of BPEA evaluated at TD-DFT with PBEPBE, B3LYP, PBE0, BHandH, CAM-B3LYP exchange-correlation functionals and 6-31G\*\*, cc-pVTZ basis sets.

| Functional                                                   | 6-31G** | cc-pVTZ | experimental |
|--------------------------------------------------------------|---------|---------|--------------|
| T <sub>1</sub> state excitation energies (cm <sup>-1</sup> ) |         |         |              |
| PBEPBE                                                       | 17410   | 17320   |              |
| B3LYP                                                        | 19870   | 19570   |              |

|           |       |       |       |
|-----------|-------|-------|-------|
| PBE1PBE   | 20510 | 20350 |       |
| BHANDH    | 23350 | 23070 |       |
| CAM-B3LYP | 23160 | ----- | 21780 |

S<sub>1</sub> state excitation energies (cm<sup>-1</sup>)

|           |       |       |       |
|-----------|-------|-------|-------|
| PBEPBE    | 9998  | 10228 |       |
| B3LYP     | 10057 | 10165 |       |
| PBE1PBE   | 9206  | 9570  |       |
| BHANDH    | 8417  | 9227  |       |
| CAM-B3LYP | 8922  | ----- | 12480 |



**Figure S11:** atom numbering of anthracene, tetracene, DPA and BPEA (see also Fig. 2 in the manuscript).

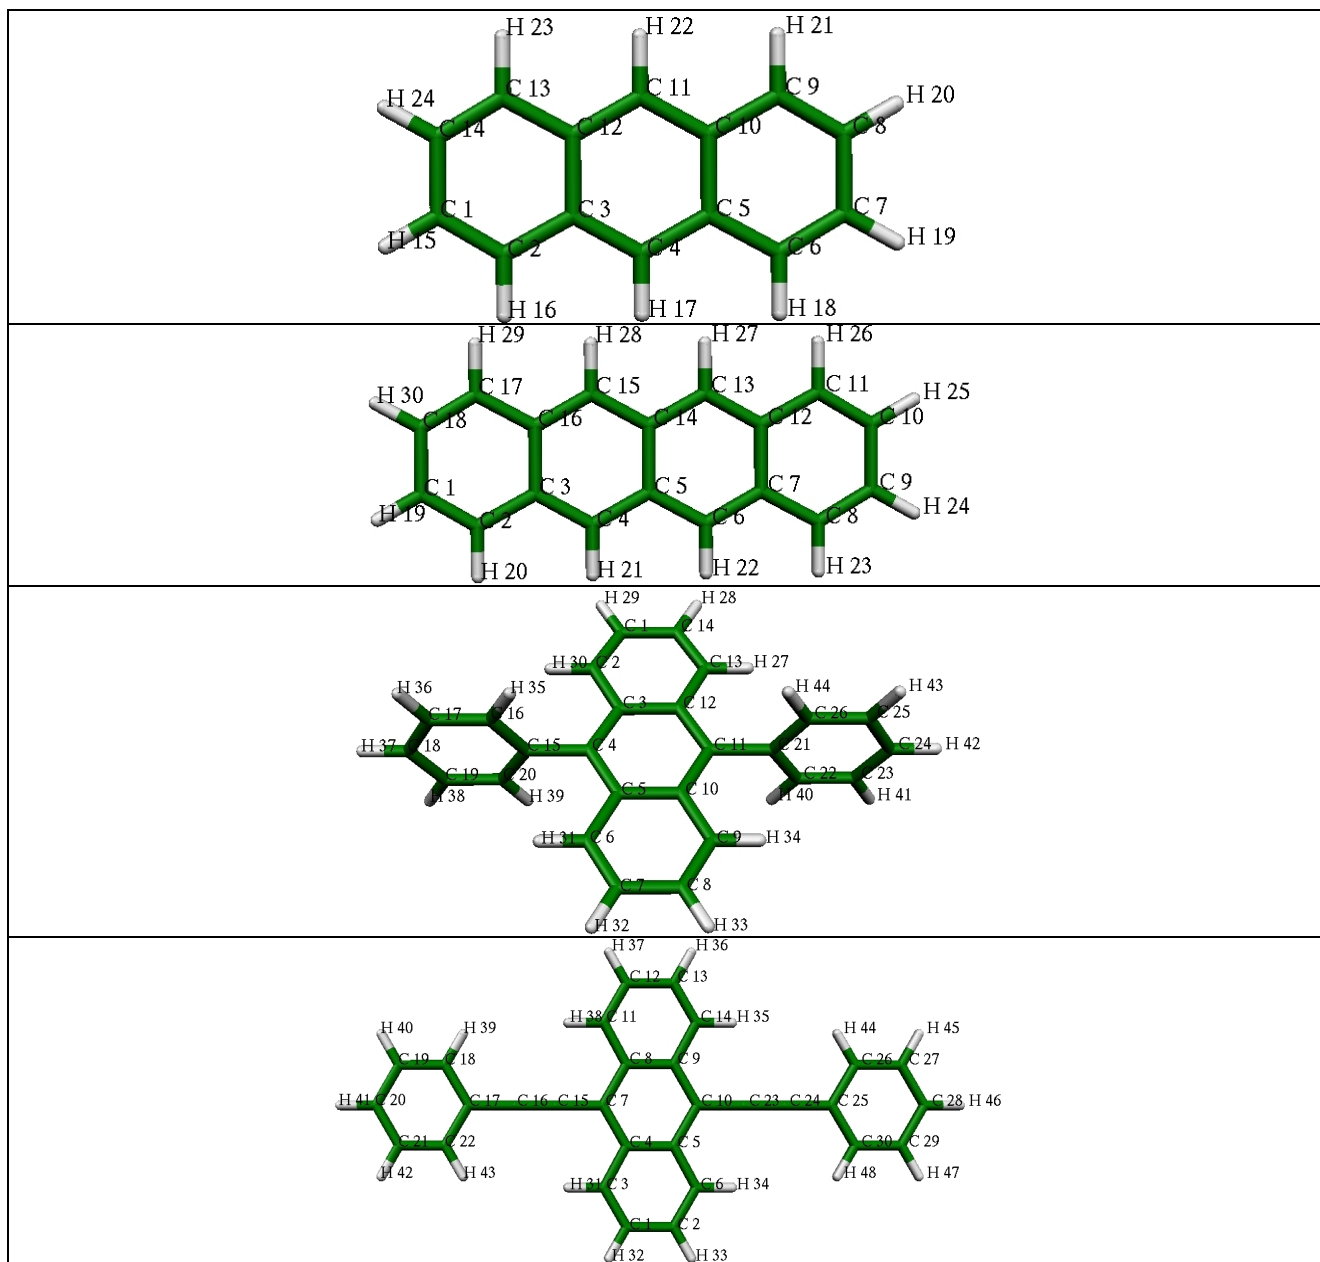

## Unit cell

**Fig SI2: ANTHRACENE**

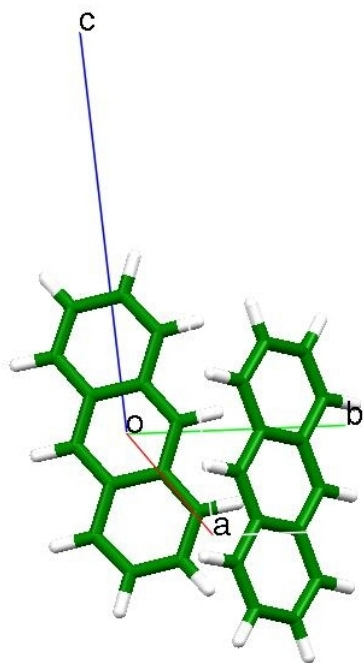

**Fig. SI3: TETRACENE**

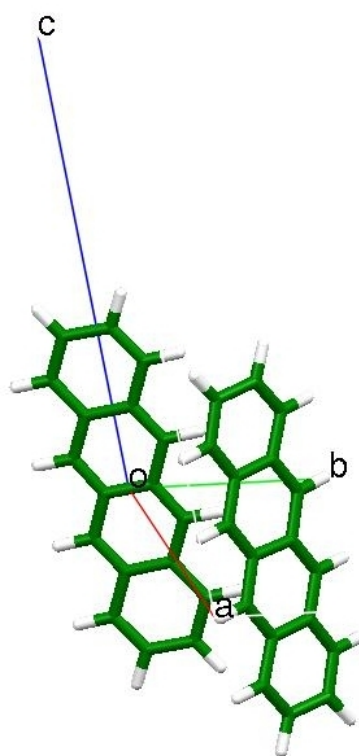

**Fig. SI4: DPA**

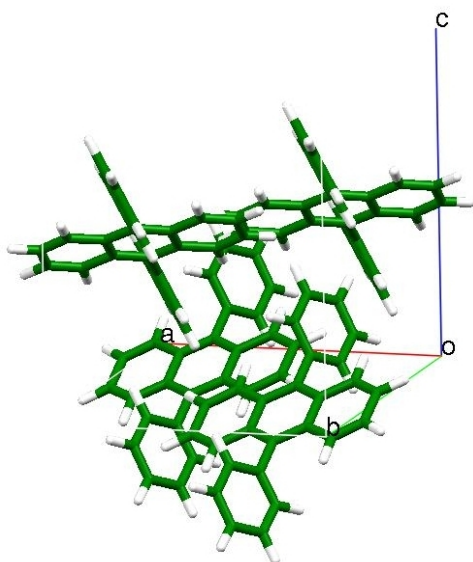

**Fig SI5: BPEA**

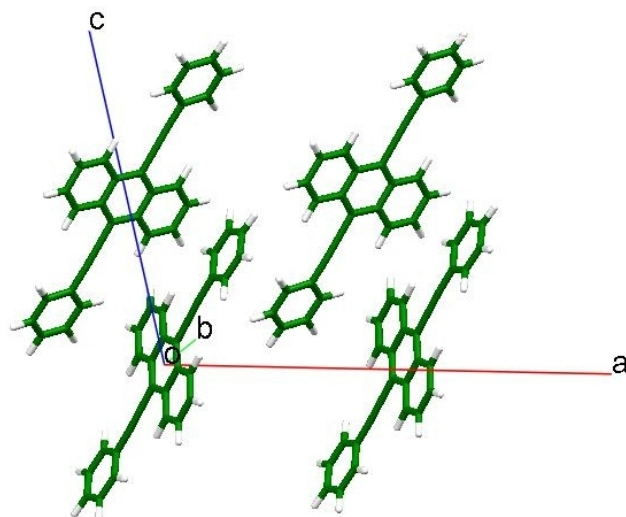

## MOLECULAR DIMERS

Fig. SI6: ANTHRACENE

DIMER A

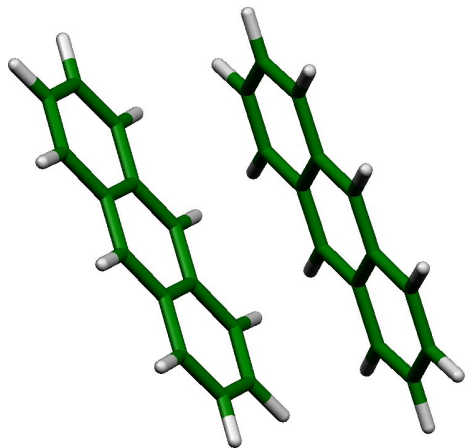

DIMER B

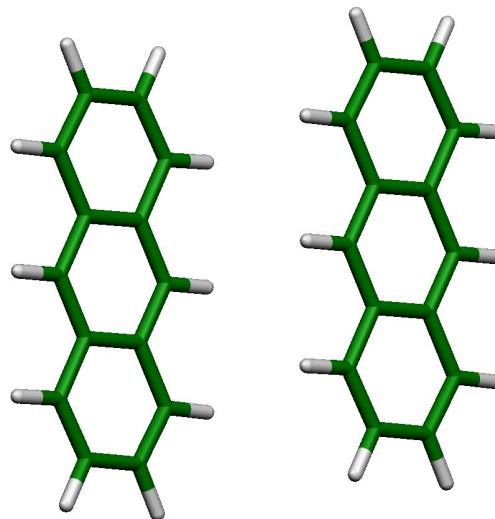

DIMER C

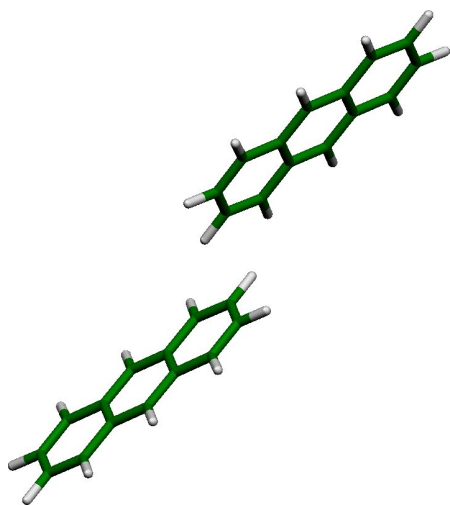

DIMER D

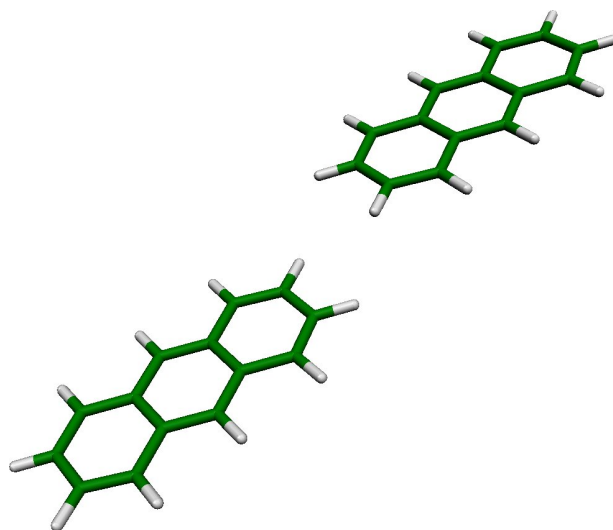

**Fig. SI7: TETRACENE**

DIMER A

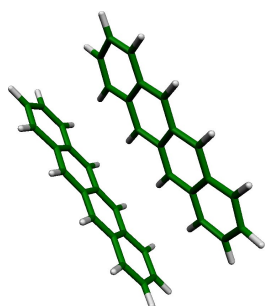

DIMER A1

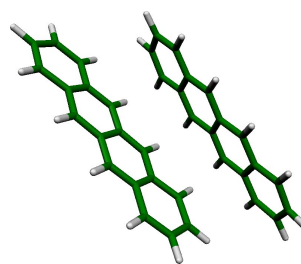

DIMER B

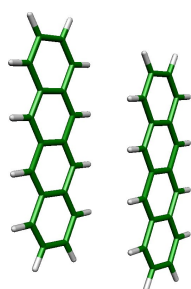

DIMER B1

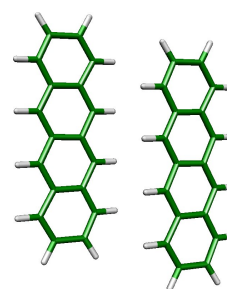

DIMER C

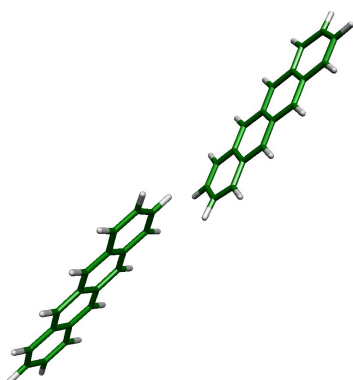

DIMER C1

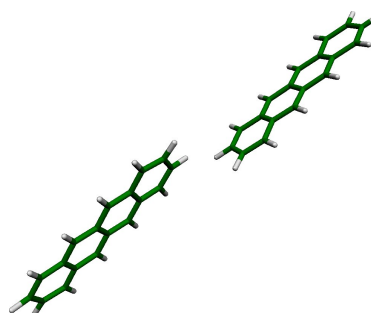

DIMER D

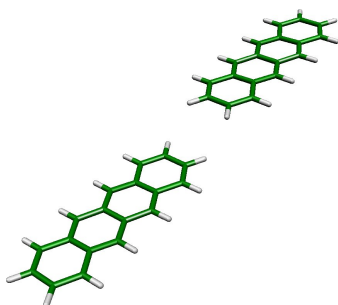

DIMER D1

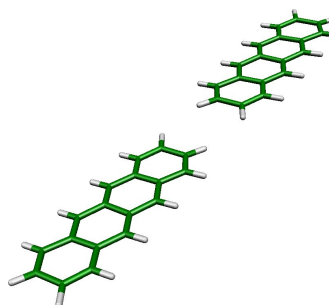

**Fig. SI8: DPA**

DIMER A

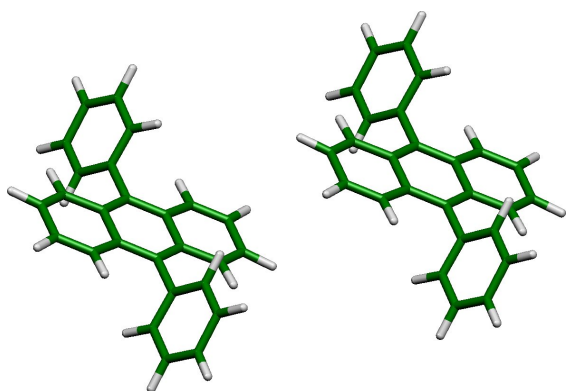

DIMER B

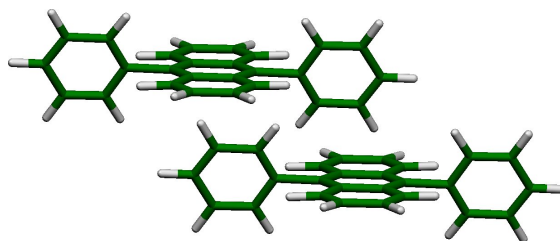

DIMER C

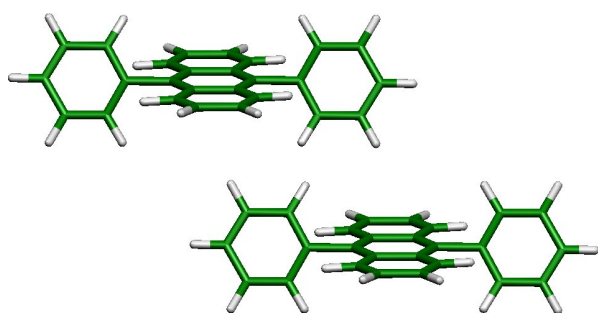

DIMER D

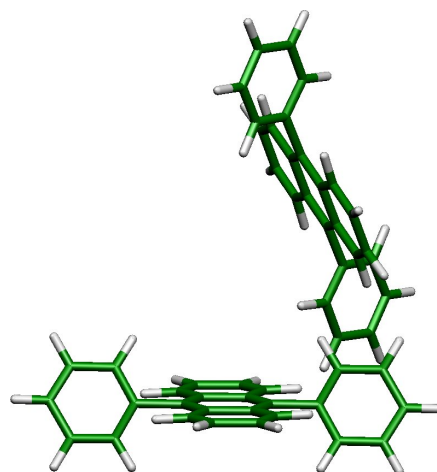

DIMER E

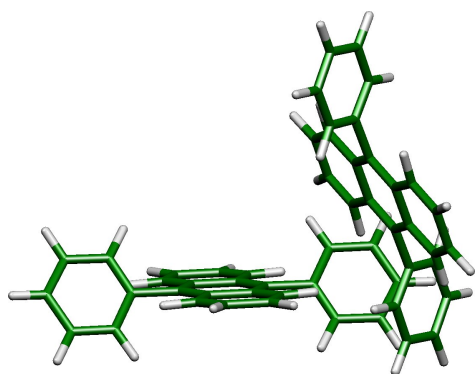

**Fig. S19: BPEA**

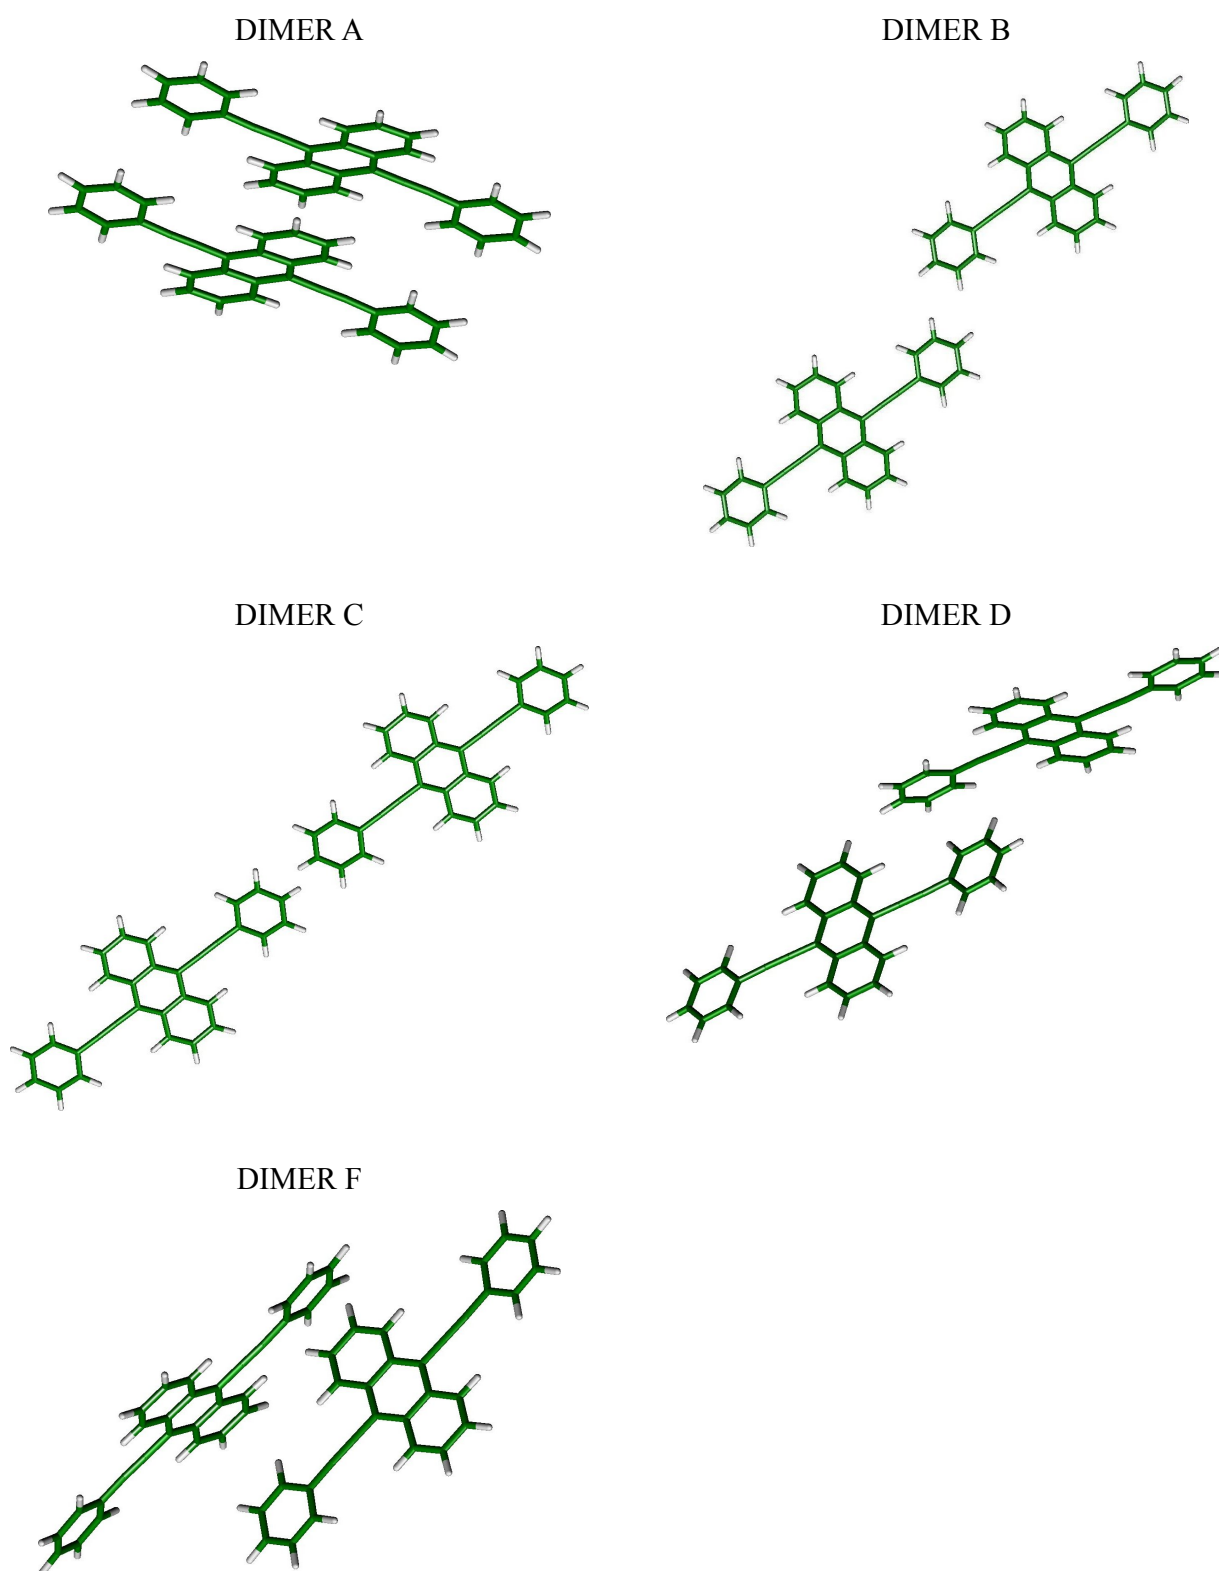

**Table SI3:** TD-B3LYP and TD-CAM-B3LYP/6-31G\*\* exciton couplings  $V$  ( $\text{cm}^{-1}$ ) evaluated with the Point Dipole Approximation (PDA) method. In Table we report also the TDDFT exciton couplings as evaluated within the supramolecular approach.

TD-B3LYP

| PDA                     |             |    |             |   |            |   |              |
|-------------------------|-------------|----|-------------|---|------------|---|--------------|
| ANTHRACENE              | tetracene   |    | DPA         |   | BPEA       |   |              |
| A                       | 41          | A  | 424         | A | 282        | A | <b>16849</b> |
| B                       | <b>1088</b> | A1 | <b>1226</b> | B | <b>740</b> | B | 740          |
| C                       | 198         | B  | 629         | C | 36         | C | 799          |
| D                       | 119         | B1 | 464         | D | 91         | D | 1973         |
|                         |             | C  | 113         | E | 444        | F | 2399         |
|                         |             | C1 | 33          |   |            |   |              |
|                         |             | D  | 63          |   |            |   |              |
|                         |             | D1 | 23          |   |            |   |              |
| supramolecular approach |             |    |             |   |            |   |              |
| ANTHRACENE              | tetracene   |    | DPA         |   | BPEA       |   |              |
| A                       | 121         | A  | —           | A | 29         | A | <b>754</b>   |
| B                       | <b>157</b>  | A1 | <b>369</b>  | B | <b>313</b> | B | 165          |
| C                       | 12          | B  | 8           | C | 48         | C | 291          |
| D                       | 15          | B1 | 107         | D | 80         | D | 255          |
|                         |             | C  | 247         | E | 265        | F | 212          |
|                         |             | C1 | 232         |   |            |   |              |
|                         |             | D  | 113         |   |            |   |              |
|                         |             | D1 | 80          |   |            |   |              |

TD-CAM-B3LYP

| PDA                     |             |    |             |   |            |   |              |
|-------------------------|-------------|----|-------------|---|------------|---|--------------|
| ANTHRACENE              | tetracene   |    | DPA         |   | BPEA       |   |              |
| A                       | 54          | A  | 576         | A | 299        | A | <b>16572</b> |
| B                       | <b>1470</b> | A1 | <b>1686</b> | B | <b>624</b> | B | 734          |
| C                       | 268         | B  | 797         | C | 114        | C | 793          |
| D                       | 161         | B1 | 646         | D | 97         | D | 1971         |
|                         |             | C  | 152         | E | 446        | F | 2314         |
|                         |             | C1 | 47          |   |            |   |              |
|                         |             | D  | 78          |   |            |   |              |
|                         |             | D1 | 33          |   |            |   |              |
| supramolecular approach |             |    |             |   |            |   |              |
| ANTHRACENE              | tetracene   |    | DPA         |   | BPEA       |   |              |
| A                       | 29          | A  | —           | A | 23         | A | <b>221</b>   |
| B                       | <b>256</b>  | A1 | —           | B | 50         | B | <b>160</b>   |
| C                       | 27          | B  | 13          | C | 61         | C | <b>231</b>   |
| D                       | 21          | B1 | <b>134</b>  | D | <b>96</b>  | D | <b>262</b>   |
|                         |             | C  | 83          | E | 25         | F | <b>215</b>   |
|                         |             | C1 | —           |   |            |   |              |
|                         |             | D  | 25          |   |            |   |              |
|                         |             | D1 | 2           |   |            |   |              |

## TRANSITION DENSITY MATRIX (TDM) PROJECTIONS

The coefficients of the projection of the transition density matrices, evaluated at ZINDO/S level, are reported (for further details on the method see also ref 48 in the manuscript).

**Table SI4: ANTHRACENE**

|         | (a,ab) |       |       |       | (b,ab) |       |      |      |
|---------|--------|-------|-------|-------|--------|-------|------|------|
|         | S1     | S2    | S3    | S4    | S1     | S2    | S3   | S4   |
| Dimer A |        |       |       |       |        |       |      |      |
| S1      | -0.65  | 0.00  | 0.00  | -0.03 | 0.76   | 0.01  | 0.00 | 0.00 |
| S2      | -0.76  | -0.01 | 0.00  | 0.03  | -0.64  | 0.01  | 0.01 | 0.01 |
| Dimer B |        |       |       |       |        |       |      |      |
| S1      | -0.71  | -0.01 | 0.00  | 0.00  | -0.70  | -0.01 | 0.00 | 0.00 |
| S2      | -0.71  | 0.01  | 0.00  | 0.01  | 0.71   | -0.01 | 0.00 | 0.01 |
| Dimer C |        |       |       |       |        |       |      |      |
| S1      | 0.79   | 0.00  | 0.00  | 0.00  | -0.61  | 0.01  | 0.00 | 0.02 |
| S2      | 0.61   | 0.00  | -0.01 | -0.01 | 0.79   | 0.02  | 0.00 | 0.01 |
| Dimer D |        |       |       |       |        |       |      |      |
| S1      | -0.71  | 0.00  | 0.00  | 0.00  | 0.71   | 0.00  | 0.00 | 0.00 |
| S2      | -0.71  | 0.00  | 0.00  | 0.00  | -0.71  | 0.00  | 0.00 | 0.00 |



**Table SI5: TETRACENE**

|          | (a,ab) |       |       |       | (b,ab) |       |       |       |
|----------|--------|-------|-------|-------|--------|-------|-------|-------|
|          | S1     | S2    | S3    | S4    | S1     | S2    | S3    | S4    |
| Dimer A  |        |       |       |       |        |       |       |       |
| S1       | -0.14  | 0.01  | 0.01  | 0.00  | -0.99  | 0.00  | 0.00  | 0.00  |
| S2       | -0.98  | -0.01 | 0.00  | 0.00  | 0.13   | 0.02  | 0.02  | -0.01 |
| Dimer A1 |        |       |       |       |        |       |       |       |
| S1       | -0.25  | 0.00  | 0.00  | 0.00  | -0.96  | 0.00  | 0.00  | 0.00  |
| S2       | -0.96  | 0.00  | 0.00  | 0.01  | 0.25   | 0.00  | 0.00  | 0.00  |
| Dimer B  |        |       |       |       |        |       |       |       |
| S1       | -0.70  | -0.01 | -0.02 | 0.00  | 0.70   | 0.01  | -0.02 | 0.00  |
| S2       | 0.70   | -0.01 | -0.02 | -0.01 | 0.70   | -0.01 | 0.02  | 0.01  |
| Dimer B1 |        |       |       |       |        |       |       |       |
| S1       | -0.71  | -0.01 | 0.01  | 0.00  | -0.71  | -0.01 | -0.01 | 0.00  |
| S2       | 0.71   | -0.01 | 0.01  | 0.00  | -0.71  | 0.01  | 0.01  | 0.00  |
| Dimer C  |        |       |       |       |        |       |       |       |
| S1       | 0.05   | 0.00  | 0.00  | 0.00  | -1.00  | 0.00  | 0.00  | 0.00  |
| S2       | 1.00   | 0.00  | 0.00  | 0.00  | 0.05   | 0.02  | 0.00  | 0.00  |
| Dimer C1 |        |       |       |       |        |       |       |       |
| S1       | 0.05   | 0.00  | 0.00  | 0.00  | -1.00  | 0.00  | 0.00  | 0.00  |
| S2       | 1.00   | 0.00  | 0.00  | 0.00  | 0.02   | -0.01 | 0.00  | 0.00  |
| Dimer D  |        |       |       |       |        |       |       |       |
| S1       | 0.71   | 0.00  | 0.00  | 0.00  | 0.71   | 0.00  | 0.00  | 0.00  |
| S2       | 0.71   | 0.00  | 0.00  | 0.00  | -0.71  | 0.00  | 0.00  | 0.00  |
| Dimer D1 |        |       |       |       |        |       |       |       |
| S1       | 0.70   | 0.00  | 0.00  | 0.00  | 0.72   | 0.00  | 0.00  | 0.00  |
| S2       | 0.72   | 0.00  | 0.00  | 0.00  | -0.70  | 0.00  | 0.00  | 0.00  |

**TABLE SI6: DPA**

NOTE: the low lying dipole allowed excited states of the isolated DPA molecule, based on the experimental X-ray structure, is the S2 state.

|         | (a,ab) |       |      |       | (b,ab) |       |      |       |
|---------|--------|-------|------|-------|--------|-------|------|-------|
|         | S1     | S2    | S3   | S4    | S1     | S2    | S3   | S4    |
| Dimer A |        |       |      |       |        |       |      |       |
| S1      | 0.71   | 0.00  | 0.00 | -0.01 | 0.71   | 0.00  | 0.00 | -0.01 |
| S2      | -0.71  | 0.00  | 0.00 | 0.00  | 0.71   | 0.00  | 0.00 | 0.00  |
| S3      | 0.00   | 0.71  | 0.00 | 0.00  | 0.00   | -0.71 | 0.00 | 0.00  |
| S4      | 0.00   | -0.71 | 0.00 | 0.01  | 0.00   | -0.71 | 0.00 | 0.01  |
| Dimer B |        |       |      |       |        |       |      |       |
| S1      | 0.70   | 0.04  | 0.00 | 0.00  | -0.71  | -0.04 | 0.00 | 0.00  |
| S2      | 0.71   | -0.03 | 0.00 | 0.00  | 0.71   | -0.03 | 0.00 | 0.00  |
| S3      | 0.04   | -0.70 | 0.00 | -0.01 | -0.04  | 0.71  | 0.00 | 0.01  |
| S4      | 0.03   | 0.71  | 0.00 | -0.02 | 0.03   | 0.70  | 0.00 | -0.02 |
| Dimer C |        |       |      |       |        |       |      |       |
| S1      | -0.71  | -0.03 | 0.00 | 0.00  | -0.71  | -0.03 | 0.00 | 0.00  |
| S2      | -0.71  | 0.03  | 0.00 | 0.00  | 0.71   | -0.03 | 0.00 | 0.00  |
| S3      | 0.03   | -0.71 | 0.00 | -0.01 | 0.03   | -0.71 | 0.00 | -0.01 |
| S4      | 0.03   | 0.71  | 0.00 | -0.01 | -0.03  | -0.71 | 0.00 | 0.01  |
| Dimer D |        |       |      |       |        |       |      |       |
| S1      | -0.54  | -0.03 | 0.00 | 0.00  | -0.84  | -0.03 | 0.00 | 0.00  |
| S2      | -0.84  | 0.02  | 0.00 | 0.00  | 0.54   | -0.03 | 0.00 | 0.01  |
| S3      | 0.03   | -0.70 | 0.00 | 0.00  | 0.03   | -0.71 | 0.00 | 0.00  |
| S4      | -0.02  | -0.71 | 0.00 | 0.00  | 0.02   | 0.70  | 0.00 | 0.00  |
| Dimer E |        |       |      |       |        |       |      |       |
| S1      | -0.75  | 0.01  | 0.00 | 0.00  | -0.66  | 0.01  | 0.00 | 0.00  |
| S2      | -0.66  | -0.01 | 0.00 | 0.00  | 0.75   | 0.01  | 0.00 | 0.00  |
| S3      | -0.01  | -0.71 | 0.00 | 0.01  | -0.01  | -0.70 | 0.00 | -0.01 |
| S4      | 0.01   | -0.70 | 0.00 | -0.01 | -0.01  | 0.71  | 0.00 | -0.01 |

**Table SI7: BPEA**

|         | (a,ab) |       |      |      | (b,ab) |       |      |      |
|---------|--------|-------|------|------|--------|-------|------|------|
|         | S1     | S2    | S3   | S4   | S1     | S2    | S3   | S4   |
| Dimer A |        |       |      |      |        |       |      |      |
| S1      | -0.70  | 0.00  | 0.00 | 0.00 | 0.70   | 0.00  | 0.00 | 0.00 |
| S2      | 0.68   | -0.01 | 0.00 | 0.00 | 0.68   | -0.01 | 0.00 | 0.00 |
| Dimer B |        |       |      |      |        |       |      |      |
| S1      | 0.71   | 0.00  | 0.00 | 0.00 | 0.71   | 0.00  | 0.00 | 0.00 |
| S2      | -0.71  | 0.00  | 0.00 | 0.00 | 0.71   | 0.00  | 0.00 | 0.00 |
| Dimer C |        |       |      |      |        |       |      |      |
| S1      | 0.71   | 0.00  | 0.00 | 0.00 | 0.71   | 0.00  | 0.00 | 0.00 |
| S2      | 0.71   | 0.00  | 0.00 | 0.00 | -0.71  | 0.00  | 0.00 | 0.00 |
| Dimer D |        |       |      |      |        |       |      |      |
| S1      | -0.72  | 0.00  | 0.00 | 0.00 | -0.69  | 0.00  | 0.00 | 0.00 |
| S2      | 0.69   | 0.00  | 0.00 | 0.00 | -0.72  | 0.00  | 0.00 | 0.00 |
| Dimer F |        |       |      |      |        |       |      |      |
| S1      | -0.71  | 0.00  | 0.00 | 0.00 | 0.71   | 0.00  | 0.00 | 0.00 |
| S2      | -0.71  | 0.01  | 0.00 | 0.00 | -0.71  | 0.01  | 0.00 | 0.00 |

**Properties of the singlet excited states of the dimers evaluated at B3LYP/6-31G\*\* level:**  
 excitation energies, oscillator strength, molecular orbitals involved and TD-DFT eigenvectors are reported.

**Table SI8: ANTHRACENE**

| State   | energy (eV) | f      | orbitals |     | MO coefficients |
|---------|-------------|--------|----------|-----|-----------------|
| Dimer A |             |        |          |     |                 |
| S1      | 2.7091      | 0.0041 | H        | L   | 0.70            |
| S2      | 3.2087      | 0.0465 | H-1      | L   | 0.63            |
|         |             |        | H-1      | L+1 | 0.14            |
| S3      | 3.2387      | 0.0626 | H        | L   | 0.64            |
| S4      | 3.4194      | 0.0084 | H-1      | L+1 | 0.69            |
| Dimer B |             |        |          |     |                 |
| S1      | 3.0756      | 0.0548 | H-1      | L+1 | 0.23            |
|         |             |        | H        | L   | 0.65            |
| S2      | 3.1146      | 0.0000 | H-1      | L   | 0.50            |
|         |             |        | H        | L+1 | 0.50            |
| S3      | 3.2623      | 0.0000 | H-1      | L   | 0.45            |
|         |             |        | H        | L+1 | -0.44           |
| S4      | 3.2641      | 0.1029 | H-1      | L+1 | 0.63            |
|         |             |        | H        | L   | -0.17           |
| Dimer C |             |        |          |     |                 |
| S1      | 3.1669      | 0.0026 | H        | L   | 0.70            |
| S2      | 3.2433      | 0.0342 | H-1      | L   | 0.60            |
|         |             |        | H        | L+1 | -0.22           |
| S3      | 3.2463      | 0.0834 | H-1      | L   | 0.22            |
|         |             |        | H        | L+1 | 0.60            |
| S4      | 3.3171      | 0.0031 | H-1      | L+1 | 0.70            |
| Dimer D |             |        |          |     |                 |
| S1      | 3.2404      | 0.0000 | H-1      | L   | 0.47            |
|         |             |        | H        | L+1 | 0.43            |
| S2      | 3.2443      | 0.1166 | H-1      | L+1 | 0.43            |
|         |             |        | H        | L   | 0.47            |
| S3      | 3.2728      | 0.0000 | H-1      | L   | -0.48           |
|         |             |        | H        | L+1 | 0.52            |
| S4      | 3.2729      | 0.0003 | H-1      | L+1 | 0.52            |
|         |             |        | H        | L   | -0.48           |

**Table SI9: TETRACENE**

| state    | energy (eV) | f      | orbitals |     | MO coefficients |
|----------|-------------|--------|----------|-----|-----------------|
| Dimer A  |             |        |          |     |                 |
| S1       | 1.8146      | 0.0056 | H        | L   | 0.70            |
| S2       | 2.3760      | 0.0600 | H-1      | L+1 | -0.11           |
| S3       | 2.4362      | 0.0443 | H-1      | L   | 0.61            |
|          |             |        | H-1      | L+1 | -0.17           |
| S4       | 2.6299      | 0.0210 | H-1      | L   | 0.14            |
|          |             |        | H-1      | L+1 | 0.67            |
| Dimer A1 |             |        |          |     |                 |
| S1       | 1.8374      | 0.0060 | H        | L   | 0.7             |
| S2       | 2.3484      | 0.0343 | H-1      | L   | 0.61            |
|          |             |        | H-1      | L+1 | 0.13            |
| S3       | 2.4737      | 0.0737 | H        | L+1 | 0.62            |
| S4       | 2.5979      | 0.0082 | H-1      | L+1 | 0.69            |
| Dimer B  |             |        |          |     |                 |
| S1       | 2.2996      | 0.0000 | H-1      | L   | 0.58            |
|          |             |        | H        | L+1 | 0.4             |
| S2       | 2.3000      | 0.0144 | H-1      | L+1 | 0.39            |
|          |             |        | H        | L   | 0.58            |
| S3       | 2.4774      | 0.0000 | H-1      | L   | -0.33           |
|          |             |        | H        | L+1 | 0.54            |
| S4       | 2.4794      | 0.1549 | H-1      | L+1 | 0.54            |
| Dimer B1 |             |        |          |     |                 |
| S1       | 2.2106      | 0.0000 | L-1      | H+1 | -0.44           |
|          |             |        | H        | L   | 0.55            |
| S2       | 2.2134      | 0.0007 | H-1      | L   | 0.52            |
|          |             |        | H        | L+1 | -0.48           |
| S3       | 2.3746      | 0.1215 | H-1      | L   | 0.42            |
|          |             |        | H        | L+1 | 0.46            |
| S4       | 2.4011      | 0.0000 | H-1      | L+1 | 0.5             |
|          |             |        | H        | L   | 0.37            |
| Dimer C  |             |        |          |     |                 |
| S1       | 2.3863      | 0.0183 | H-1      | L   | -0.12           |
|          |             |        | H        | L   | 0.67            |
| S2       | 2.3957      | 0.0414 | H-1      | L   | 0.64            |
| S3       | 2.4788      | 0.0906 | H-1      | L+1 | -0.17           |
|          |             |        | H        | L+1 | 0.61            |
| S4       | 2.4918      | 0.0160 | H-1      | L   | 0.65            |

|          |        |        |     |     |      |       |
|----------|--------|--------|-----|-----|------|-------|
|          |        |        | H   | L+1 |      | 0.24  |
| Dimer C1 |        |        |     |     |      |       |
| S1       | 2.3922 | 0.0512 | H   | L   |      | 0.6   |
|          |        |        | H   | L+1 |      | 0.19  |
| S2       | 2.4163 | 0.0037 | H   | L   |      | -0.26 |
|          |        |        | H   | L+1 | 0.65 |       |
| S3       | 2.4710 | 0.0904 | H-1 | L   |      | 0.52  |
|          |        |        | H-1 | L+1 |      | -0.36 |
| S4       | 2.4954 | 0.0068 | H-1 | L   |      | 0.44  |
|          |        |        | H-1 | L+1 |      | 0.55  |
| Dimer D  |        |        |     |     |      |       |
| S1       | 2.4736 | 0.1956 | H-1 | L   |      | 0.5   |
|          |        |        | H   | L+1 |      | -0.37 |
| S2       | 2.4775 | 0.0000 | H-1 | L+1 |      | -0.31 |
|          |        |        | H   | L   |      | 0.55  |
| S3       | 2.5008 | 0.0032 | H-1 | L   |      | 0.44  |
|          |        |        | H   | L+1 |      | 0.55  |
| S4       | 2.5017 | 0.0000 | H-1 | L+1 |      | 0.59  |
|          |        |        | H   | L   |      | 0.38  |
| Dimer D1 |        |        |     |     |      |       |
| S1       | 2.3895 | 0.0018 | H-1 | L+1 |      | 0.4   |
|          |        |        | H   | L   |      | 0.46  |
| S2       | 2.3898 | 0.1107 | H-1 | L   |      | 0.43  |
|          |        |        | H   | L+1 |      | 0.44  |
| S3       | 2.4092 | 0.0000 | H-1 | L   |      | 0.5   |
|          |        |        | H   | L+1 |      | -0.5  |
| S4       | 2.4092 | 0.0000 | H-1 | L+1 |      | 0.52  |
|          |        |        | H   | L   |      | -0.47 |

**Table SI10: DPA**

| state   | energy (eV) | f      | orbitals |     | MO coefficients |
|---------|-------------|--------|----------|-----|-----------------|
| Dimer A |             |        |          |     |                 |
| S1      | 3.5913      | 0.0000 | H-1      | L+1 | -0.33           |
|         |             |        | H        | L   | 0.56            |
| S2      | 3.5984      | 0.2777 | H-1      | L   | 0.55            |
|         |             |        | H        | L+1 | -0.34           |
| S3      | 3.7193      | 0.0128 | H-1      | L   | 0.39            |
|         |             |        | H        | L+1 | 0.58            |

|         |        |        |     |     |       |
|---------|--------|--------|-----|-----|-------|
| S4      | 3.7207 | 0.0000 | H-1 | L+1 | 0.59  |
|         |        |        | H   | L   | 0.38  |
| Dimer B |        |        |     |     |       |
| S1      | 3.5965 | 0.0000 | H-1 | L   | -0.25 |
|         |        |        | H   | L+1 | 0.60  |
| S2      | 3.6743 | 0.0000 | H-1 | L   | 0.63  |
|         |        |        | H   | L+1 | 0.31  |
| S3      | 3.6743 | 0.0000 | H-1 | L   | 0.63  |
|         |        |        | H   | L+1 | 0.31  |
| S4      | 3.6859 | 0.0533 | H-1 | L+1 | 0.65  |
|         |        |        | H   | L   | 0.24  |
| Dimer C |        |        |     |     |       |
| S1      | 3.5921 | 0.0000 | H-1 | L+1 | 0.41  |
|         |        |        | H   | L   | 0.50  |
| S2      | 3.6041 | 0.2800 | H-1 | L   | 0.46  |
|         |        |        | H   | L+1 | 0.45  |
| S3      | 3.6806 | 0.0002 | H-1 | L   | -0.50 |
|         |        |        | H   | L+1 | 0.50  |
| S4      | 3.6811 | 0.0000 | H-1 | L+1 | 0.54  |
|         |        |        | H   | L   | -0.46 |
| Dimer D |        |        |     |     |       |
| S1      | 3.5967 | 0.1121 | H-1 | L+1 | 0.45  |
|         |        |        | H   | L   | 0.47  |
| S2      | 3.6166 | 0.1938 | H-1 | L   | 0.46  |
|         |        |        | H   | L+1 | 0.45  |
| S3      | 3.6754 | 0.0000 | H-1 | L   | -0.5  |
|         |        |        | H   | L+1 | 0.5   |
| S4      | 3.6754 | 0.0001 | H-1 | L+1 | 0.51  |
|         |        |        | H   | L   | -0.49 |
| Dimer E |        |        |     |     |       |
| S1      | 3.5916 | 0.0829 | H-1 | L   | 0.26  |
|         |        |        | H   | L+1 | 0.6   |
| S2      | 3.5951 | 0.1533 | H-1 | L+1 | 0.19  |
|         |        |        | H   | L   | 0.63  |
| S3      | 3.6521 | 0.0079 | H-1 | L   | 0.62  |
|         |        |        | H   | L+1 | -0.31 |
| S4      | 3.6573 | 0.0363 | H-1 | L+1 | 0.65  |
|         |        |        | H   | L   | -0.25 |

**Table SI11: BPEA**

| state   | energy (eV) | f      | orbitals |     | MO coefficients |
|---------|-------------|--------|----------|-----|-----------------|
| Dimer A |             |        |          |     |                 |
| S1      | 2.2033      | 0.1778 | H-1      | L+1 | -0.29           |
|         |             |        | H        | L   | 0.63            |
| S2      | 2.2421      | 0.0000 | H-1      | L   | 0.61            |
|         |             |        | H        | L+1 | -0.34           |
| S3      | 2.4720      | 0.0000 | H-1      | L   | 0.28            |
|         |             |        | H        | L+1 | 0.57            |
| S4      | 2.6589      | 1.1059 | H-1      | L+1 | 0.60            |
|         |             |        | H        | L   | 0.21            |
| Dimer B |             |        |          |     |                 |
| S1      | 2.5270      | 1.7293 | H-1      | L   | 0.44            |
|         |             |        | H        | L+1 | 0.44            |
| S2      | 2.5628      | 0.0000 | H-1      | L+1 | -0.47           |
|         |             |        | H        | L   | 0.53            |
| S3      | 2.5629      | 0.0000 | H-1      | L   | -0.50           |
|         |             |        | H        | L+1 | 0.50            |
| S4      | 2.5678      | 0.0000 | H-1      | L+1 | 0.47            |
|         |             |        | H        | L   | 0.40            |
| Dimer C |             |        |          |     |                 |
| S1      | 2.5020      | 1.5596 | H-1      | L+1 | -0.19           |
|         |             |        | H        | L   | 0.61            |
| S2      | 2.5594      | 0.0000 | H-1      | L   | 0.55            |
|         |             |        | H        | L+1 | 0.44            |
| S3      | 2.5732      | 0.2613 | H-1      | L+1 | 0.64            |
|         |             |        | H        | L   | 0.26            |
| S4      | 2.5741      | 0.0000 | H-1      | L   | -0.37           |
|         |             |        | H        | L+1 | 0.50            |
| Dimer D |             |        |          |     |                 |
| S1      | 2.3565      | 0.0029 | H        | L   | 0.71            |
| S2      | 2.5103      | 1.6951 | H-1      | L   | 0.45            |
|         |             |        | H        | L+1 | 0.43            |
| S3      | 2.5736      | 0.0262 | H-1      | L   | -0.43           |
|         |             |        | H        | L+1 | 0.45            |
| S4      | 2.6121      | 0.0035 | H-1      | L+1 | 0.71            |
| Dimer F |             |        |          |     |                 |
| S1      | 2.3737      | 0.0002 | H-1      | L+1 | -0.46           |
|         |             |        | H        | L   | 0.53            |
| S2      | 2.3744      | 0.0011 | H-1      | L   | 0.51            |



|    |        |        |     |     |       |
|----|--------|--------|-----|-----|-------|
|    |        |        | H   | L+1 | -0.49 |
| S3 | 2.5099 | 0.0384 | H-1 | L+1 | 0.48  |
|    |        |        | H   | L   | 0.40  |
| S4 | 2.5626 | 1.4381 | H-1 | L   | 0.43  |
|    |        |        | H   | H+1 | 0.45  |

## High density planes for anthracene, tetracene and BPEA molecular crystals

**Fig. S110: ANTHRACENE**

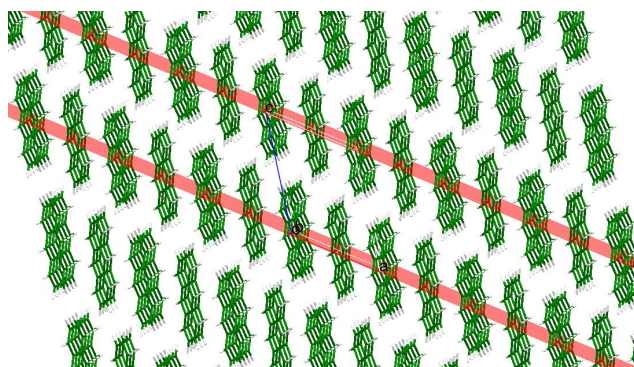

**Fig. S111: TETRACENE**

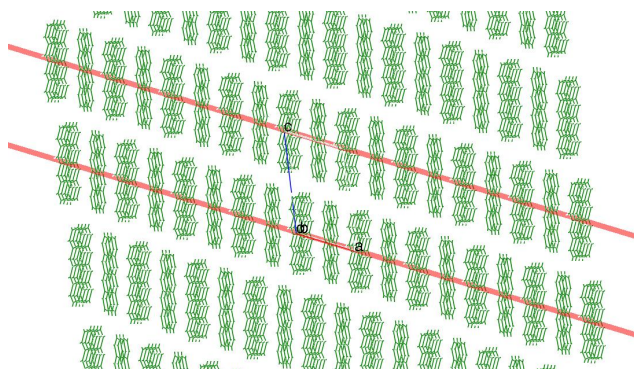

**Fig. S112: BPEA**

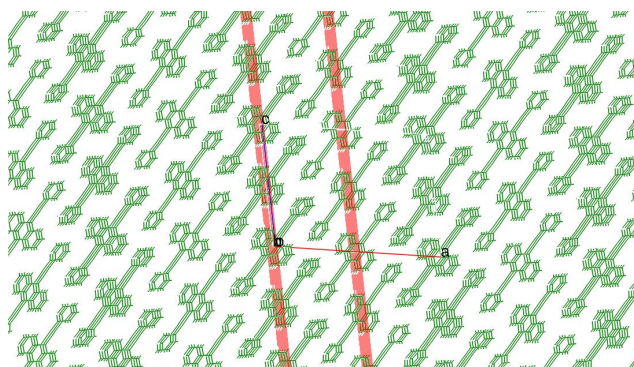

**Fig. SI13: TD-B3LYP/6-31G\*\* SINGLET EXCITED STATES OF THE DIMERS**

In the panels below reported (SI13-SI16) for each dimer and for each molecular crystal, we considered in the first column the excited state energies of molecule *a*, in the third column the excited states of molecule *b* while in the central (second) column the excited states of the dimer *ab*.

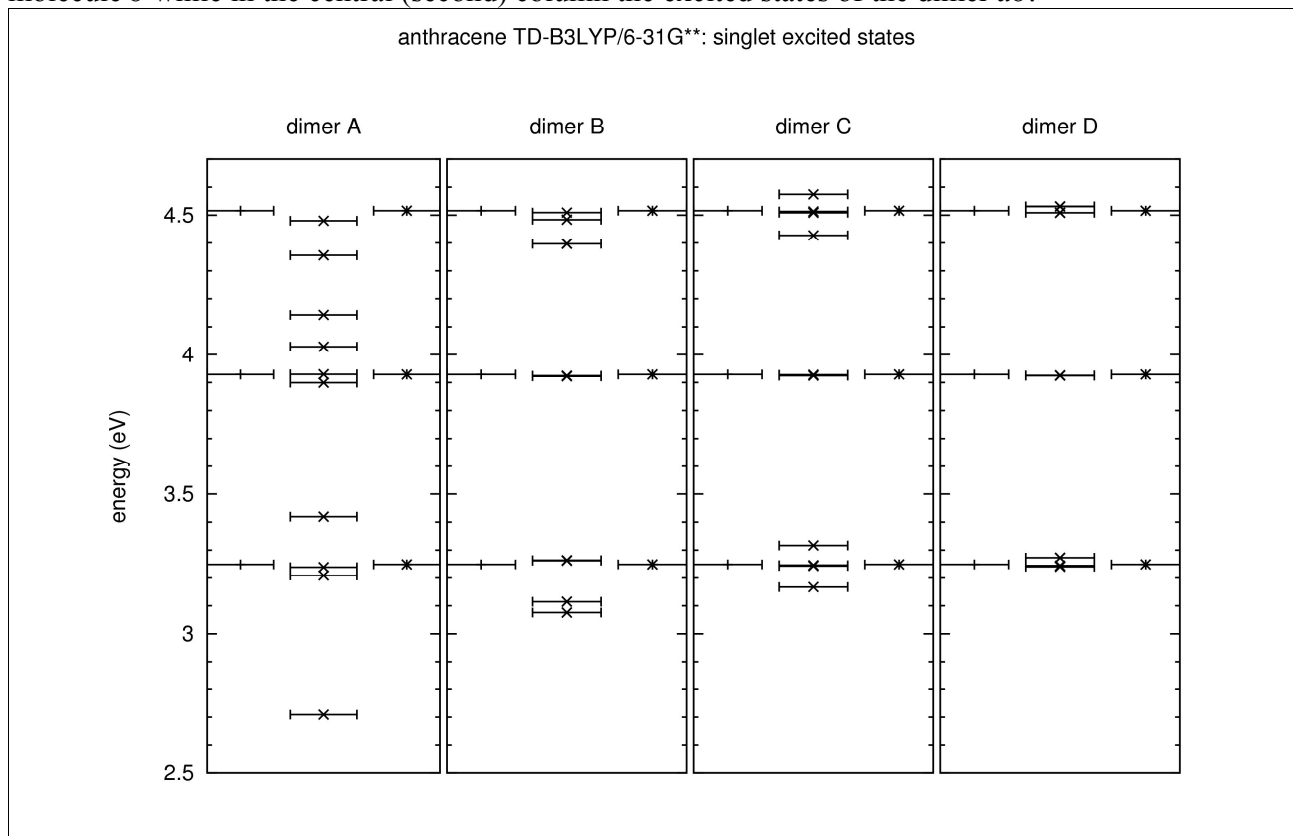

tetracene TD-B3LYP/6-31G\*\*: singlet excited states (part 1)

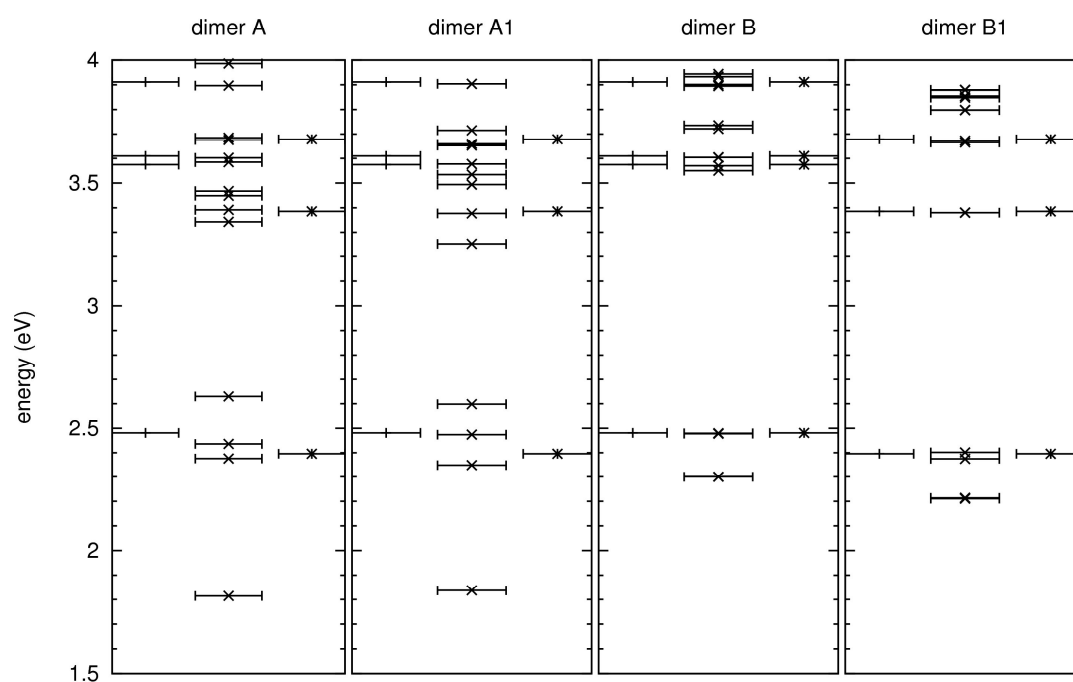

tetracene TD-B3LYP/6-31G\*\*: singlet excited states (part 2)

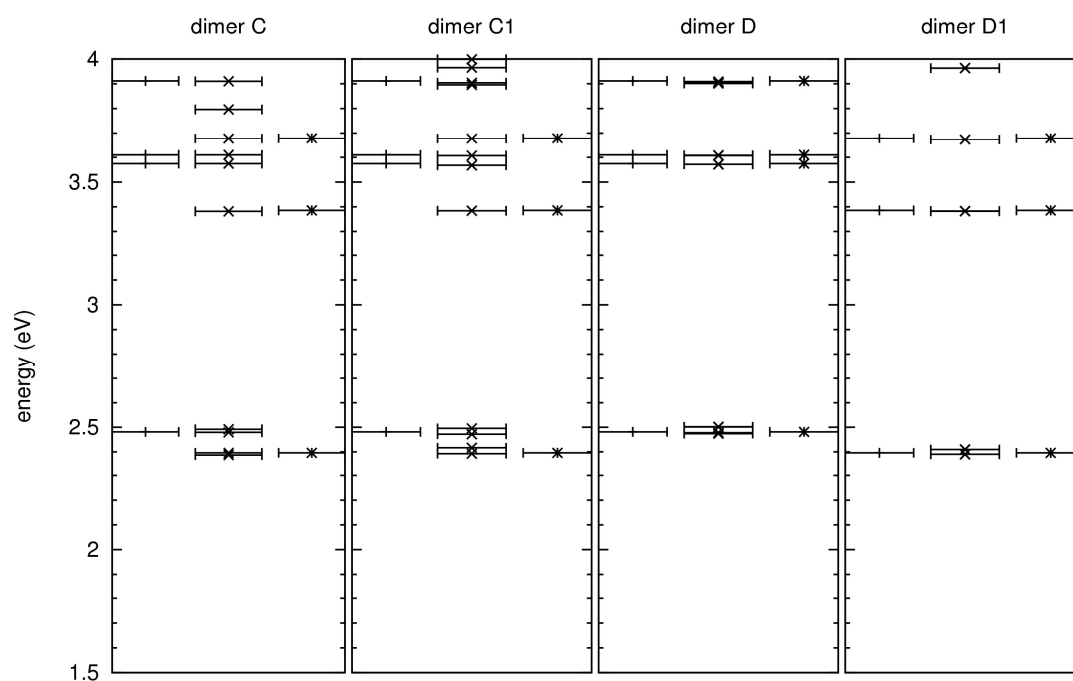

DPA TD-B3LYP/6-31G\*\*: singlet excited states

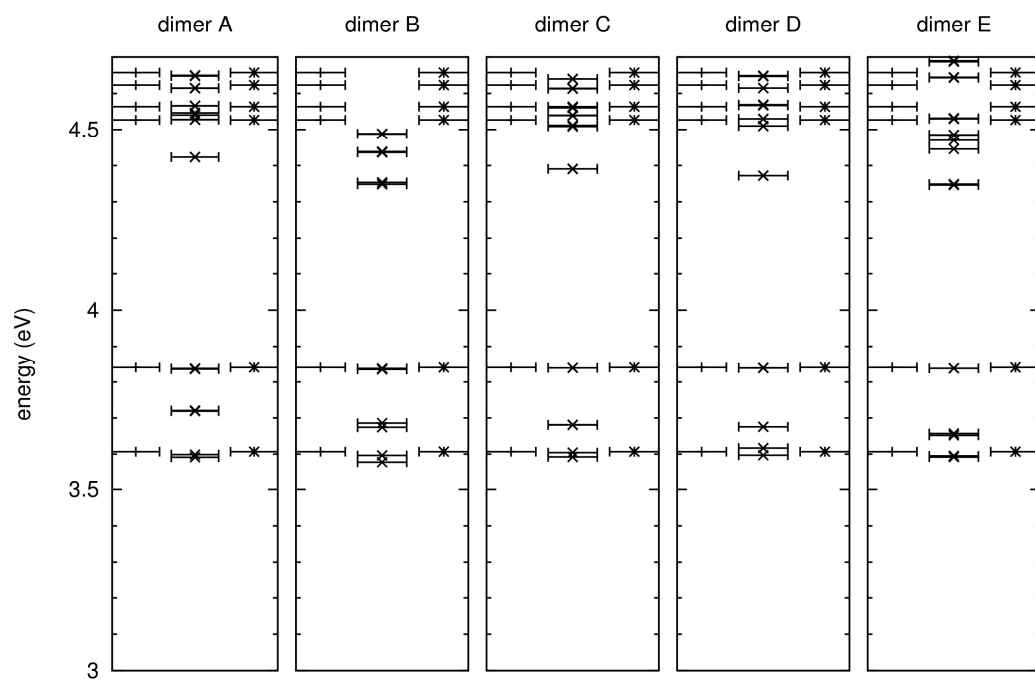

BPEA TD-B3LYP/6-31G\*\*: singlet excited states

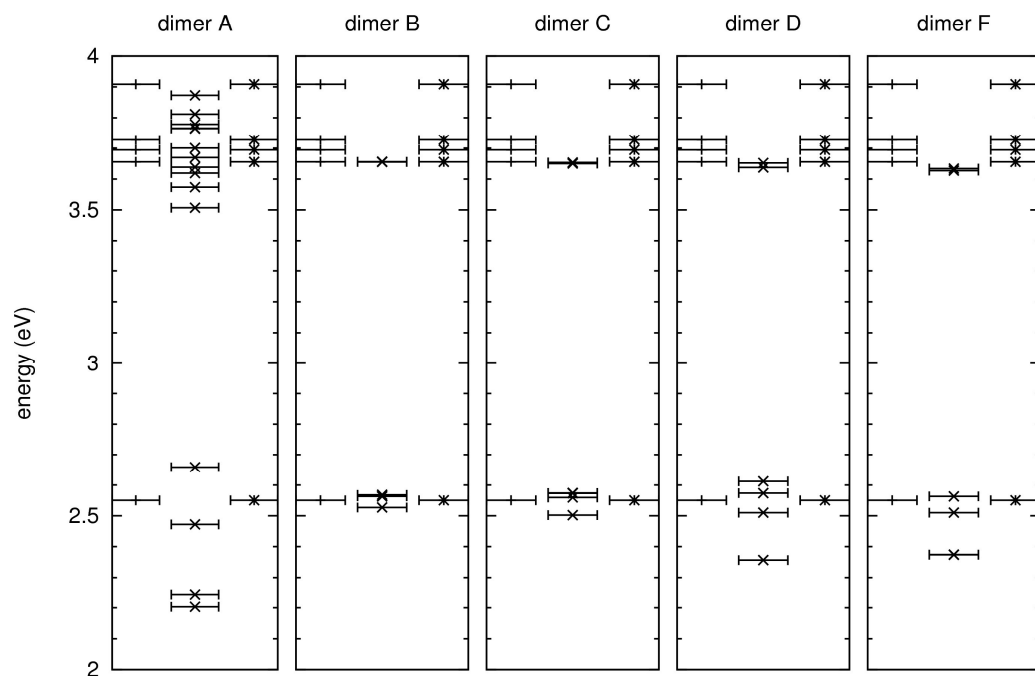

**Fig. S114: TD-CAM-B3LYP/6-31G\*\* SINGLET EXCITED STATES**

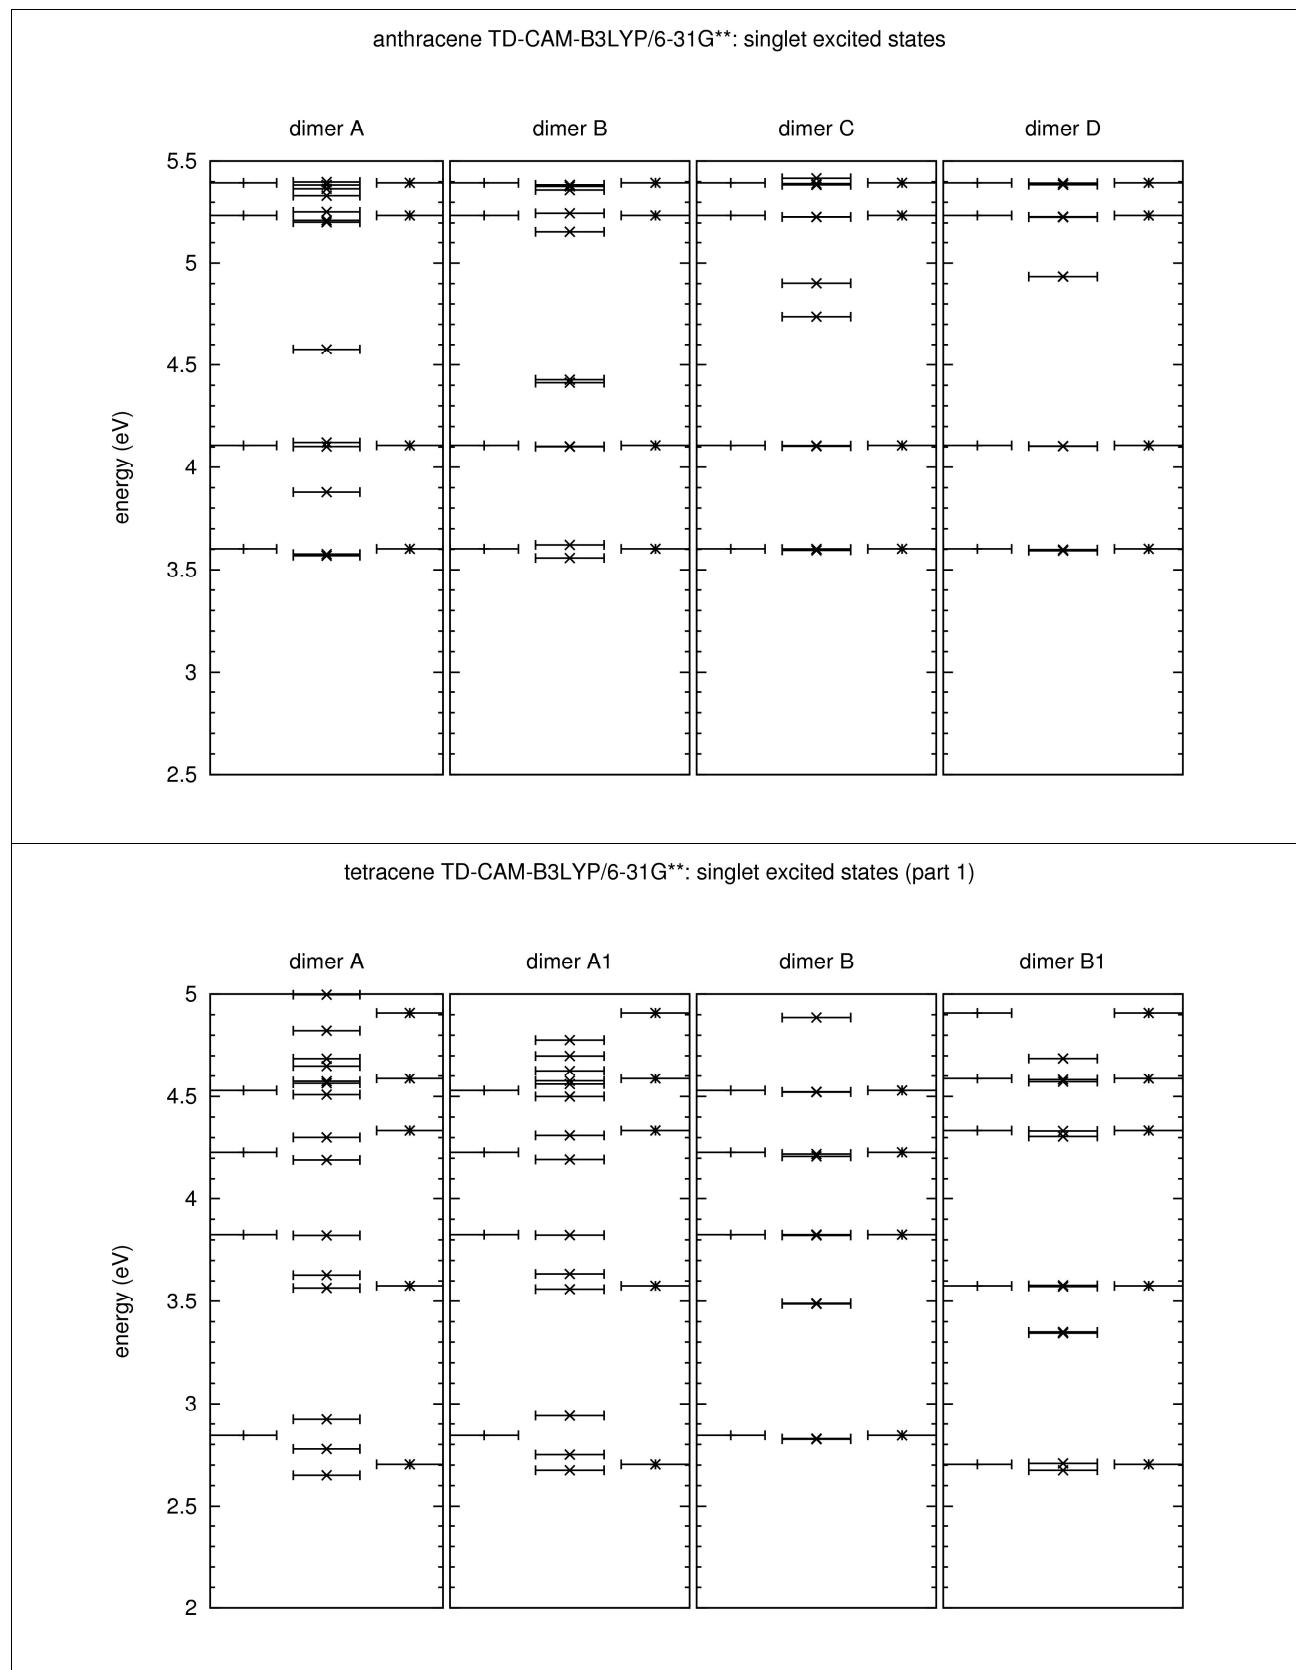

tetracene TD-CAM-B3LYP/6-31G\*\*: singlet excited states (part 2)

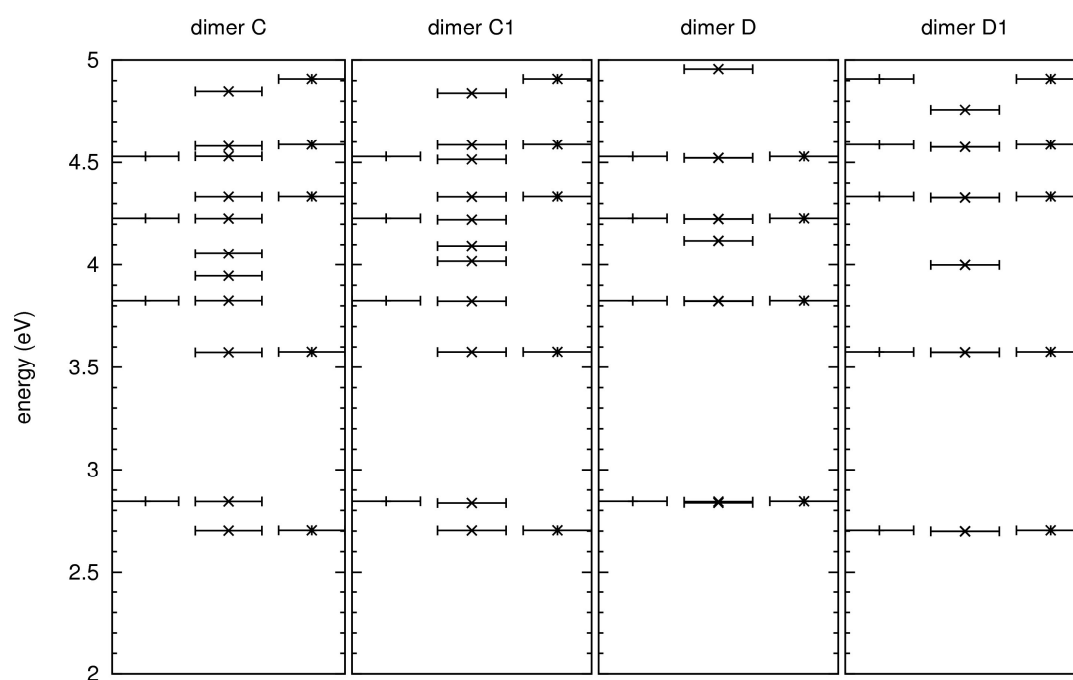

DPA TD-CAM-B3LYP/6-31G\*\*: singlet excited states

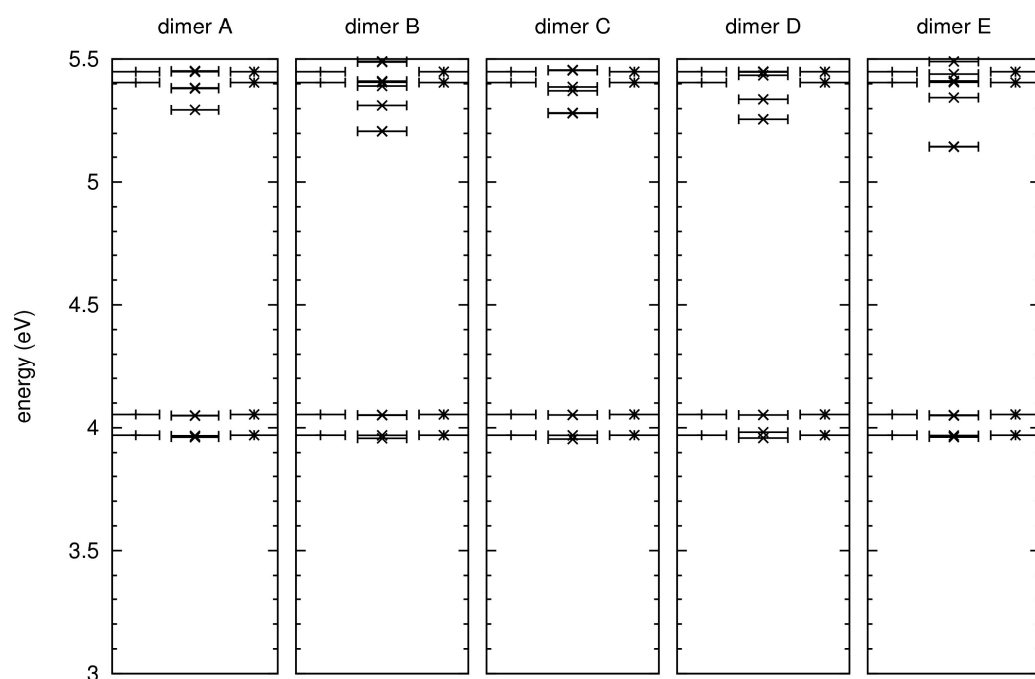





**Fig. SI15: TD-B3LYP/6-31G\*\* TRIPLET EXCITED STATES**

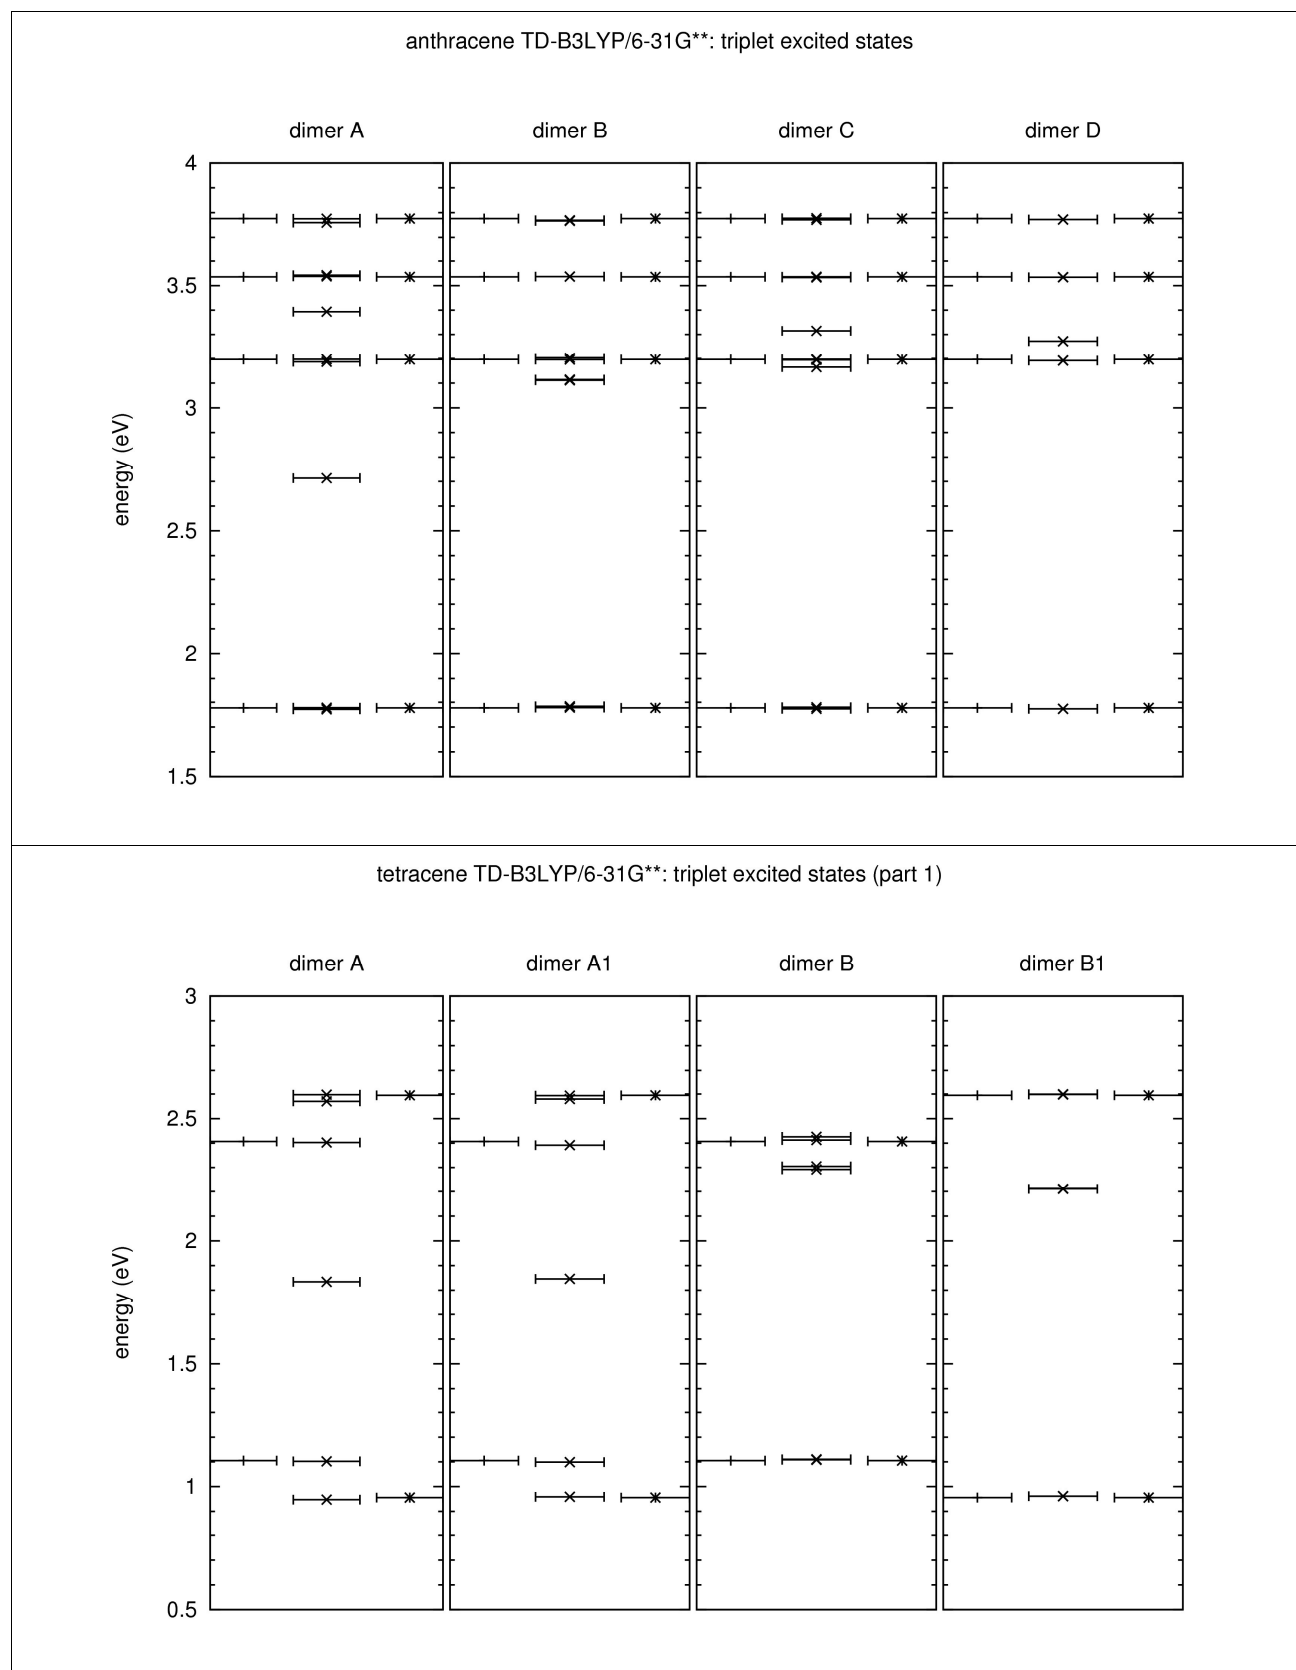

tetracene TD-B3LYP/6-31G\*\*: triplet excited states (part 2)

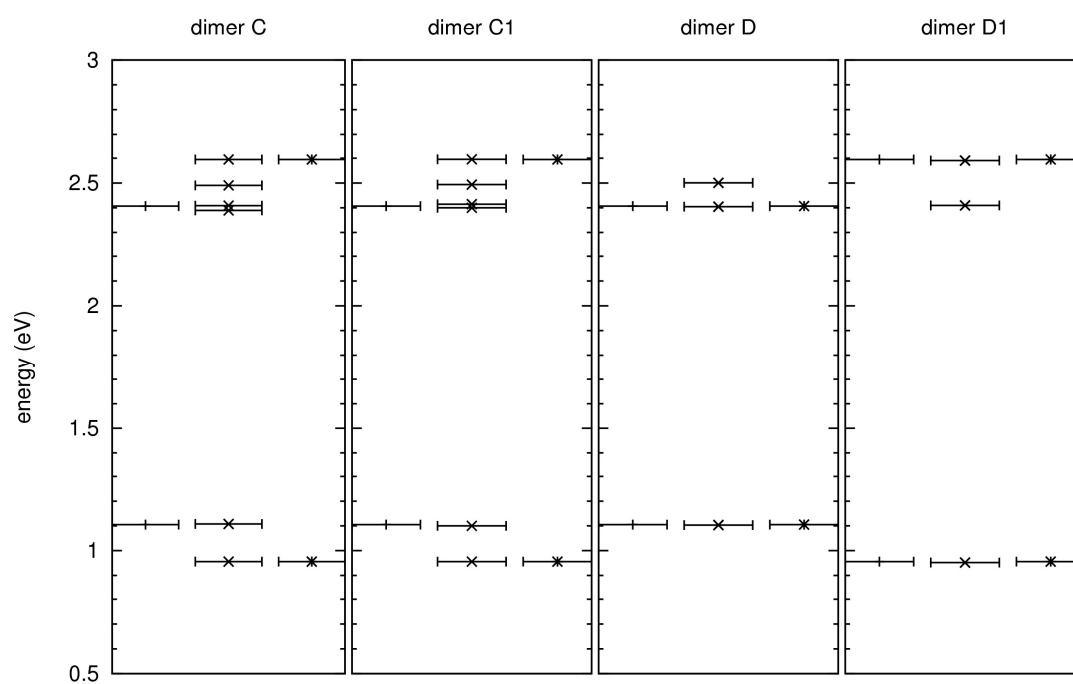

DPA TD-B3LYP/6-31G\*\*: triplet excited states

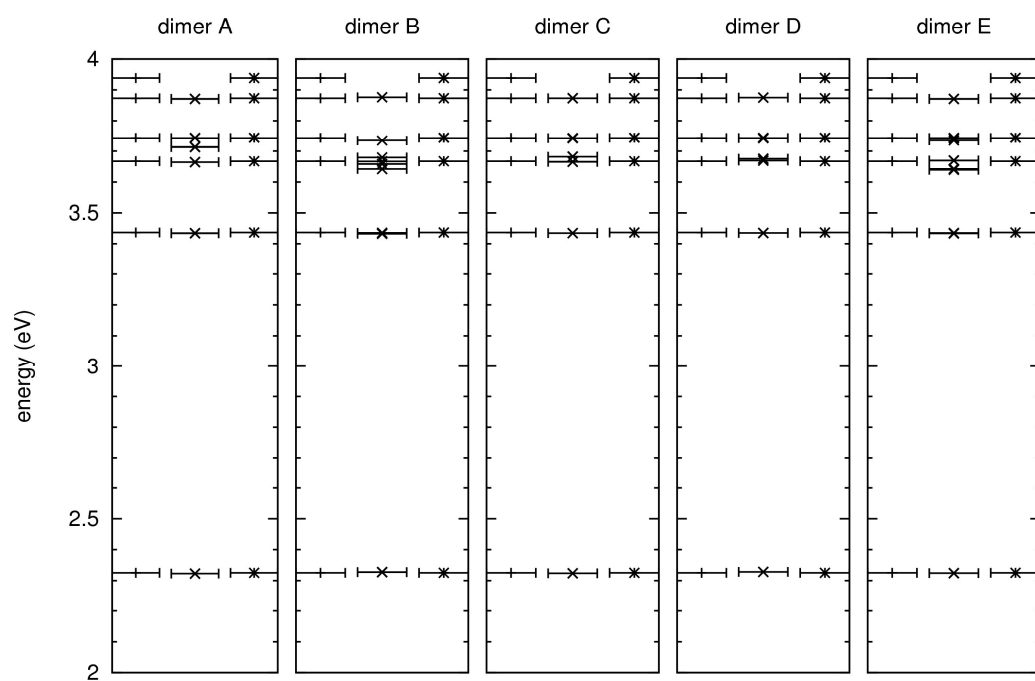

BPEA TD-B3LYP/6-31G\*\*: triplet excited states

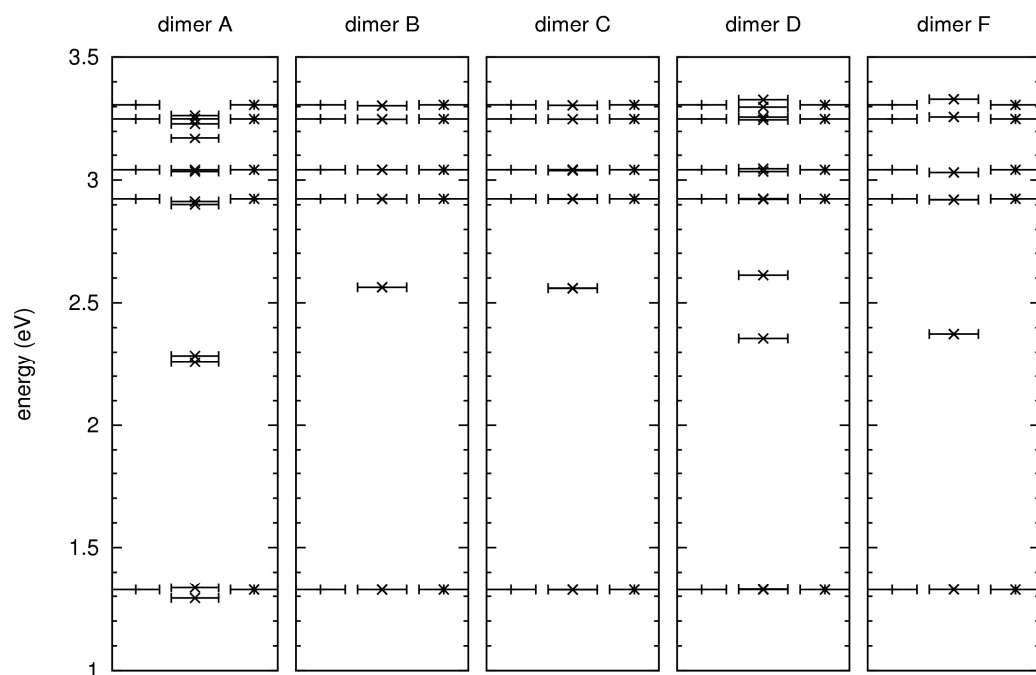

**Fig. SI16: TD-CAM-B3LYP/6-31G\*\* TRIPLET EXCITED STATES**

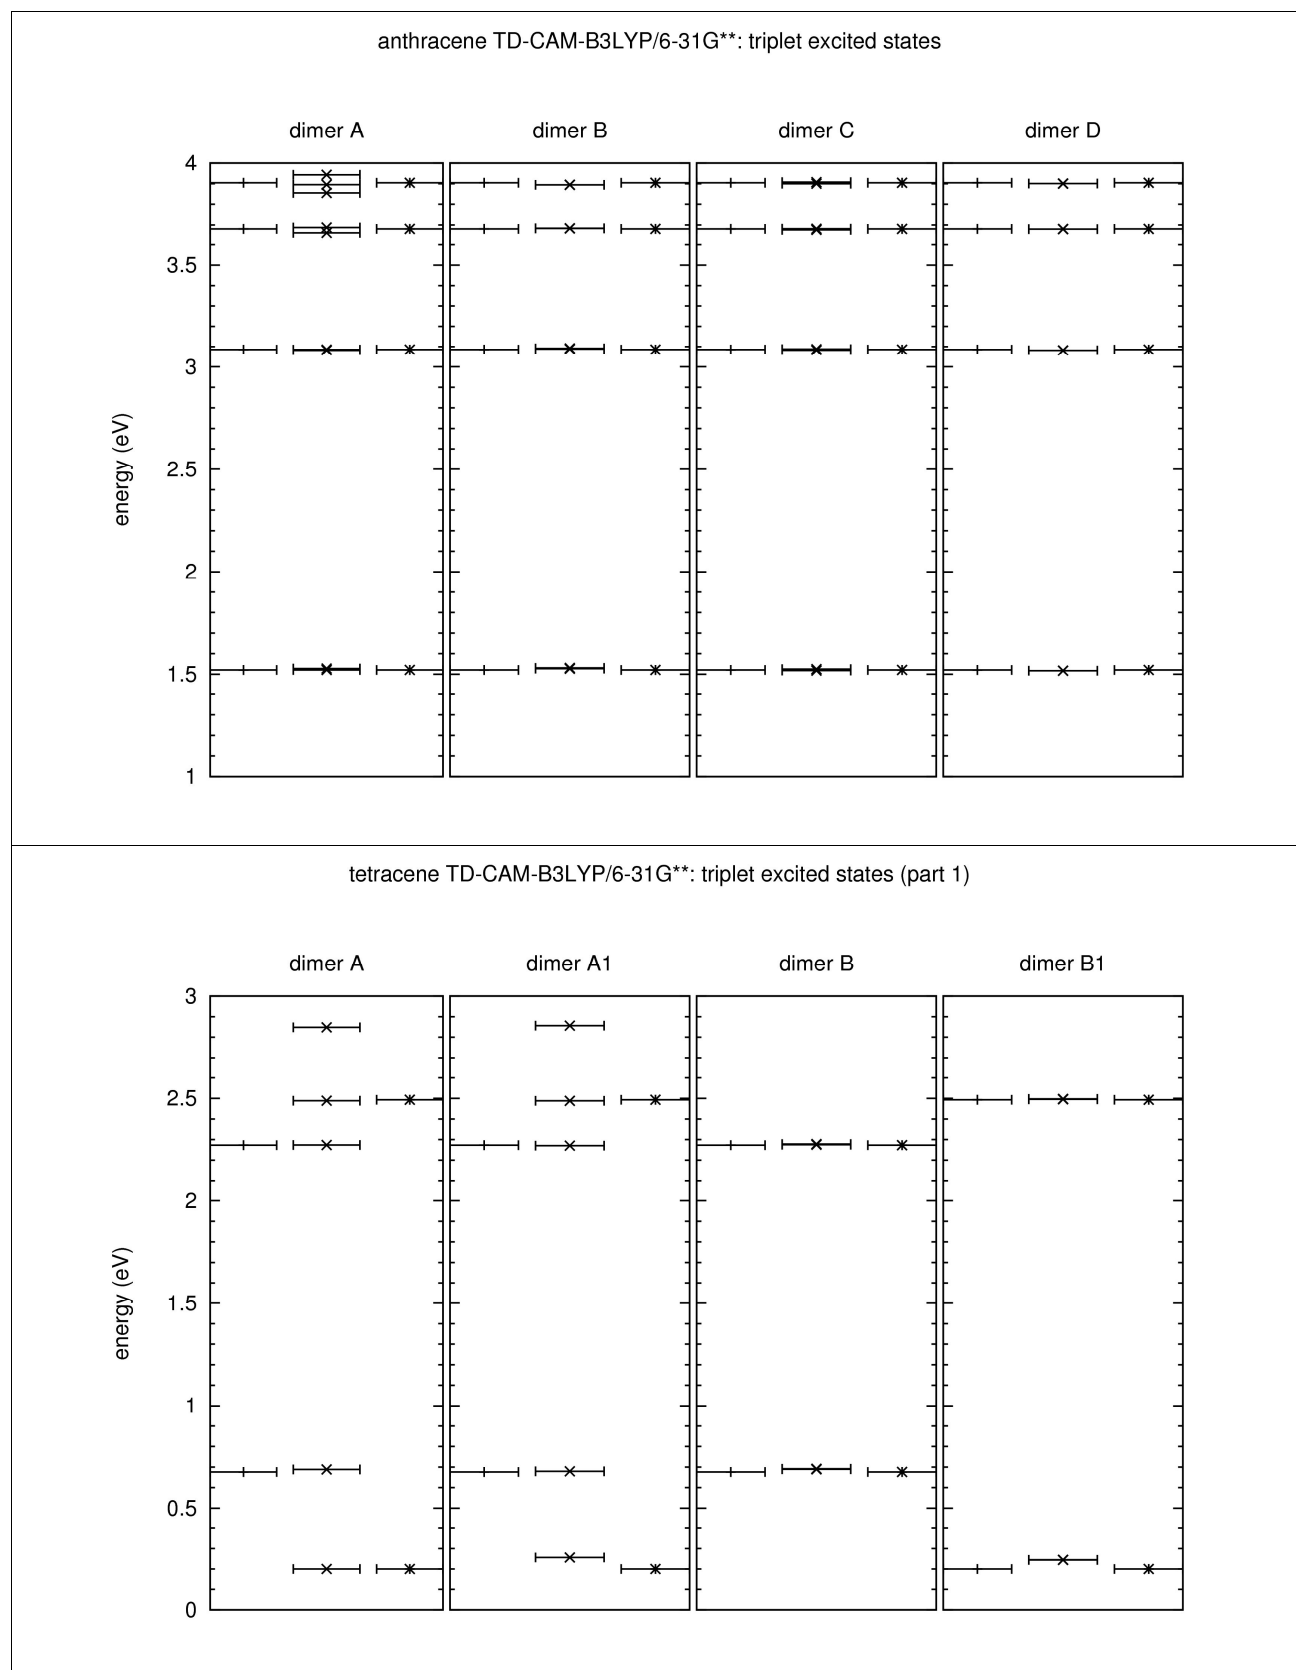

tetracene TD-CAM-B3LYP/6-31G\*\*: triplet excited states (part 2)

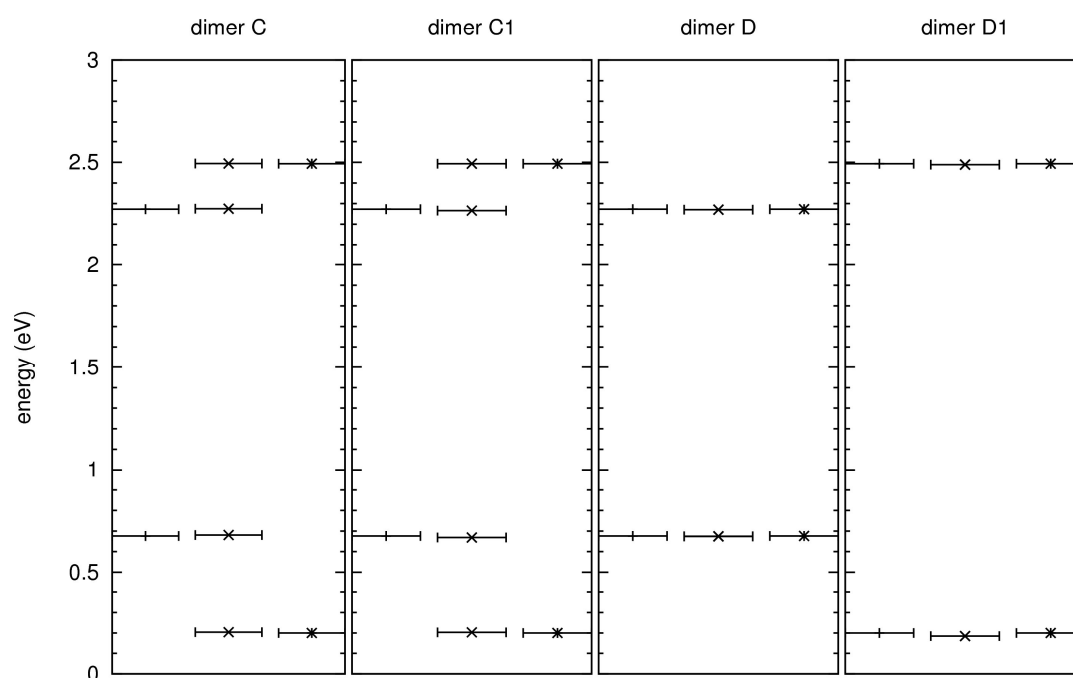

DPA TD-CAM-B3LYP/6-31G\*\*: triplet excited states

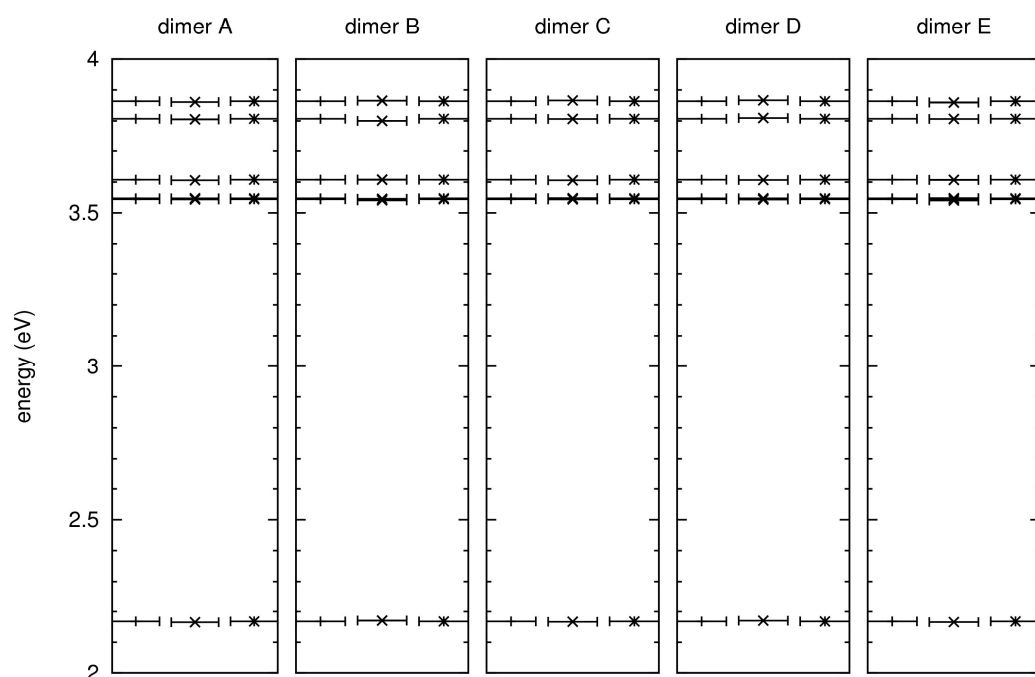

BPEA TD-CAM-B3LYP/6-31G\*\*: triplet excited states

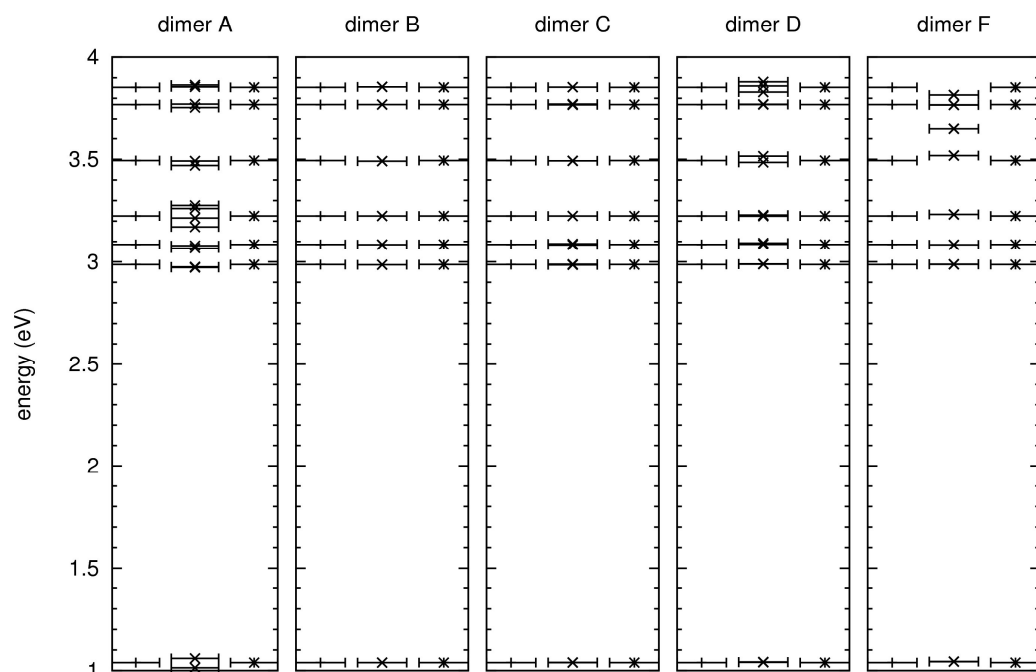

Supplement: c1cp21246j.pdf [file c1cp21246j.pdf]
